# Supplementary material
Source: publisher figshare collection journal article supplement (https://acs.figshare.com/ndownloader/files/11448872)
Supplement: Supplementary file 1 [file 11448872]

***Supporting Information for***

**Chemodivergent Tandem Cyclizations of 2-Indolylmethanols  
with Tryptophols: C–N versus C–C Bond Formation**

Jing-Yi Wang, Ping Wu, Jia-Le Wu, Guang-Jian Mei\* and Feng Shi\*

*School of Chemistry and Materials Science, Jiangsu Normal University, Xuzhou, 221116, China*

*E-mail: [fshi@jsnu.edu.cn](mailto:fshi@jsnu.edu.cn); [guangjianM@jsnu.edu.cn](mailto:guangjianM@jsnu.edu.cn)*

**Contents:**

- 1. NMR spectra of products 3-4 and 6-8 (S2-S46)**
  
  
  
  
  
  
  
  
  
  
- 2. HPLC copies of product 3aa (S47)**
  
  
  
  
  
  
  
  
  
  
- 3. X-ray single crystal data for products 3aa and 4aa (S48-S51)**

# 1. NMR spectra of products 3 and 4

## 3aa

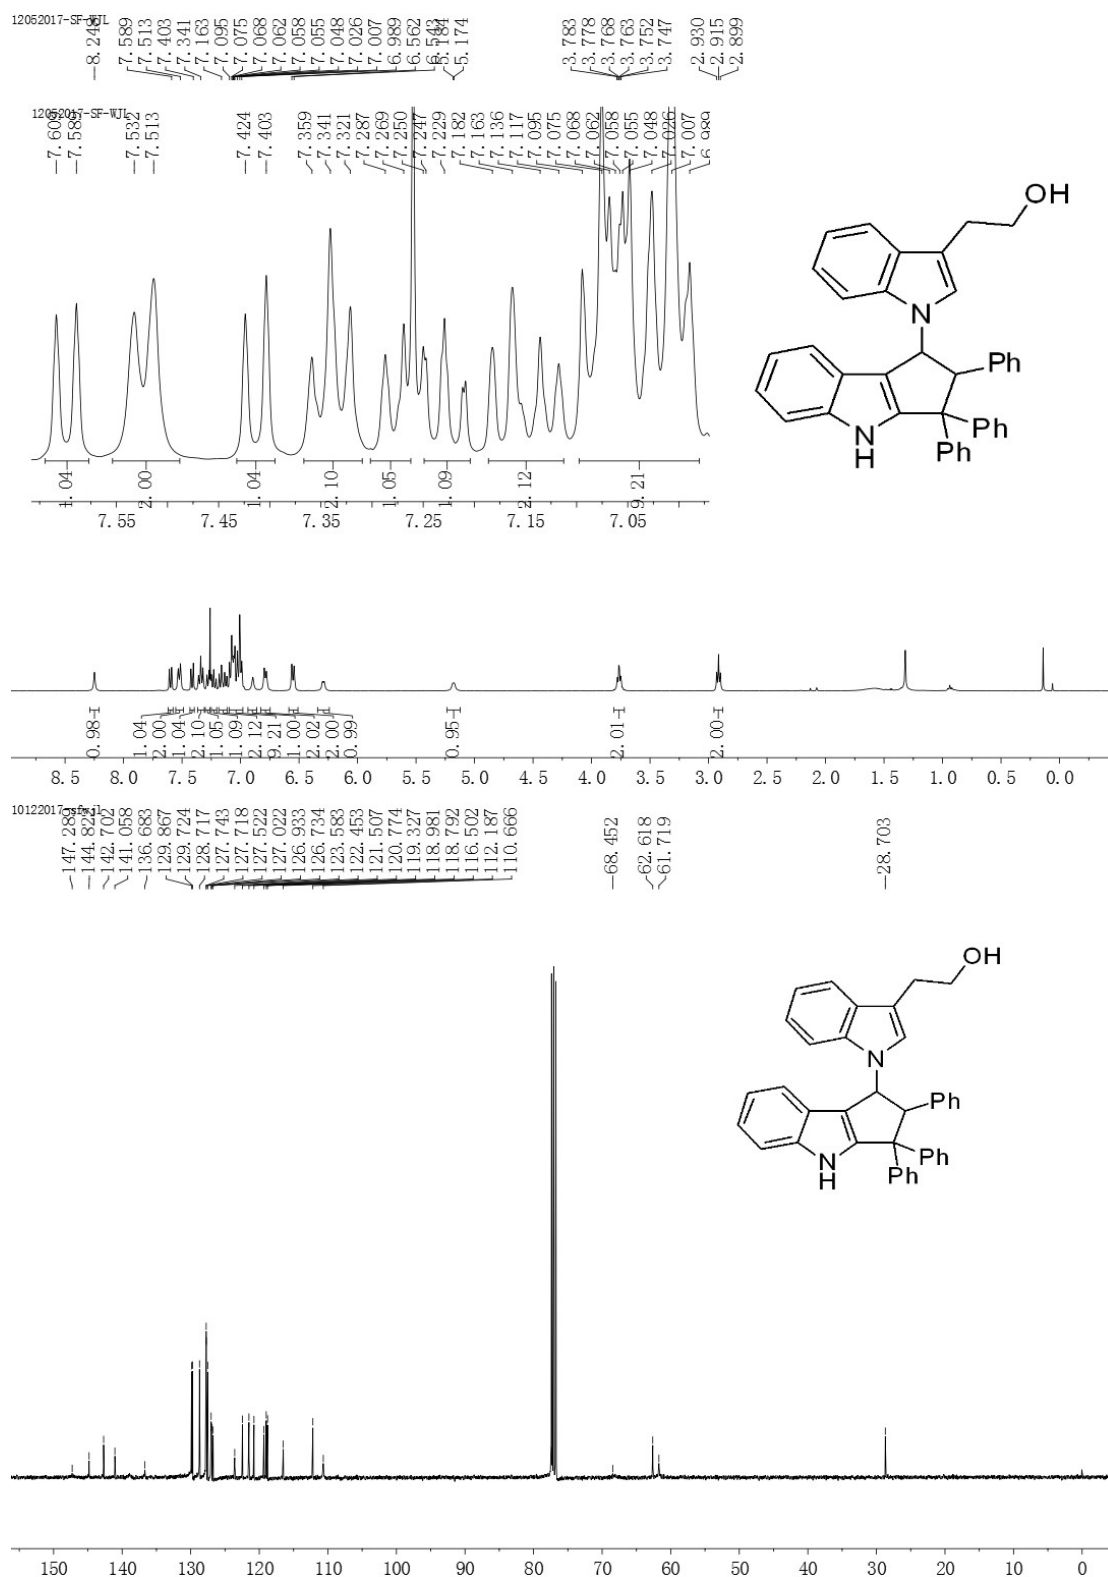

### 3ba

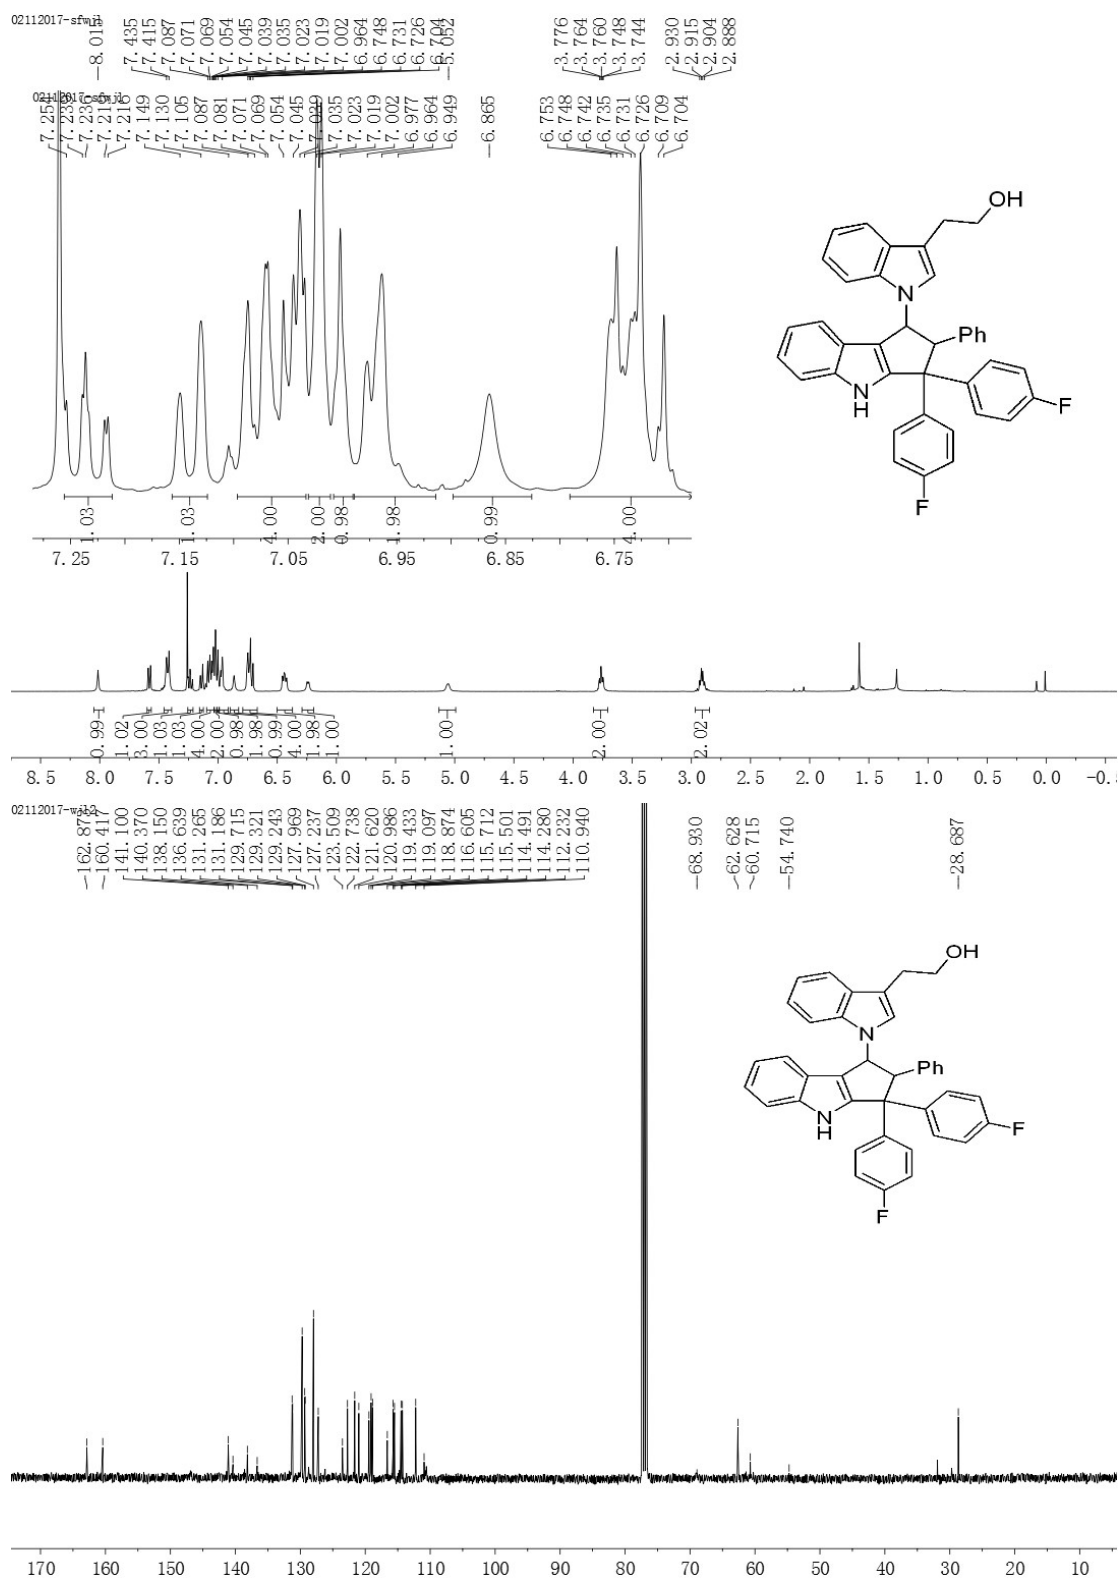

## 08092017-sfwjl2

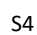



# 3ea

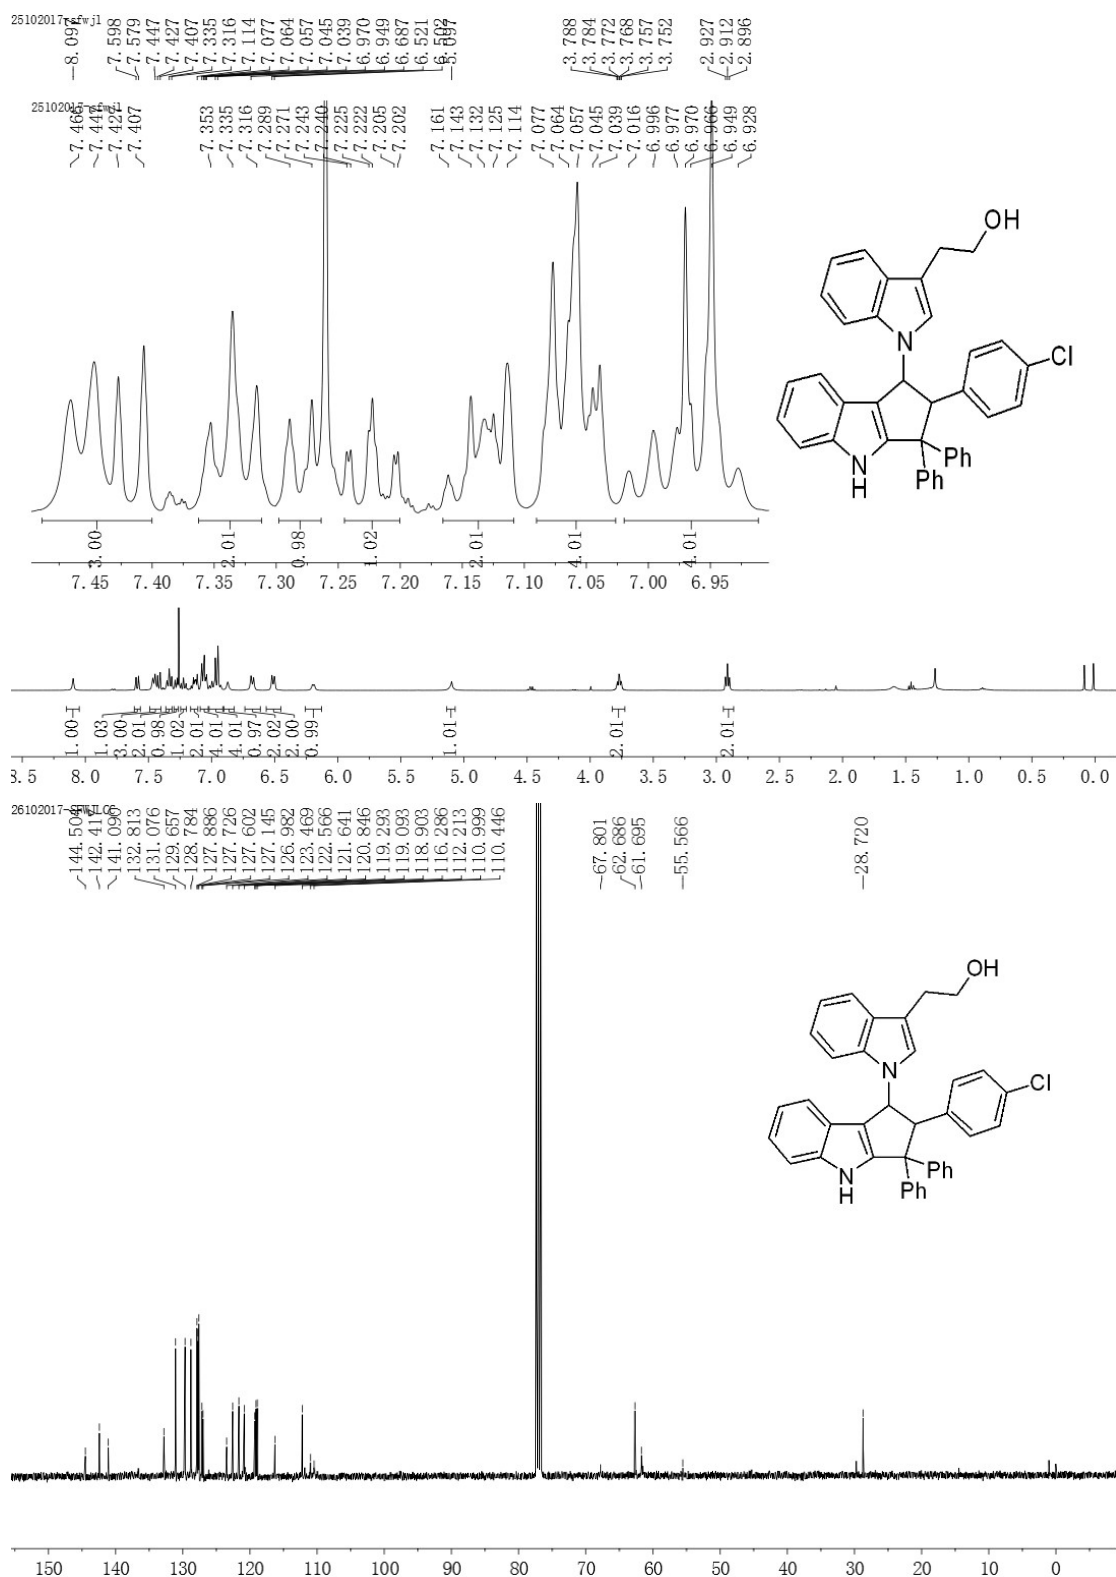

# **3fa**

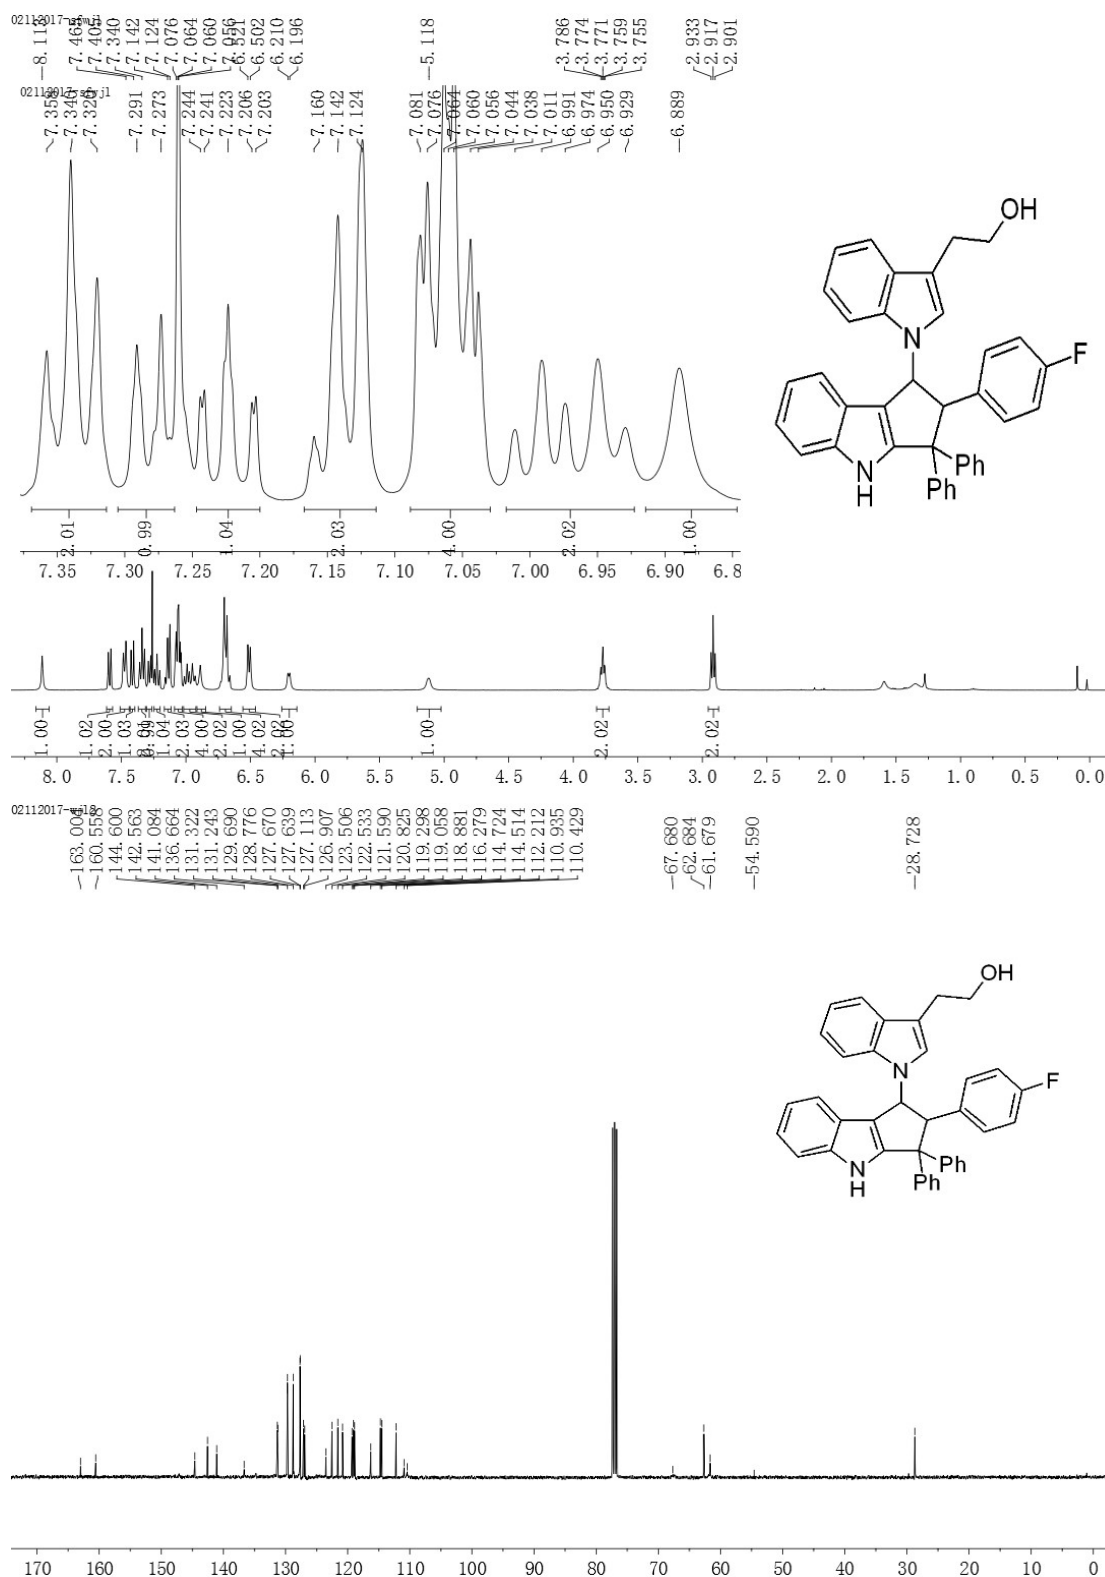

# 3ga

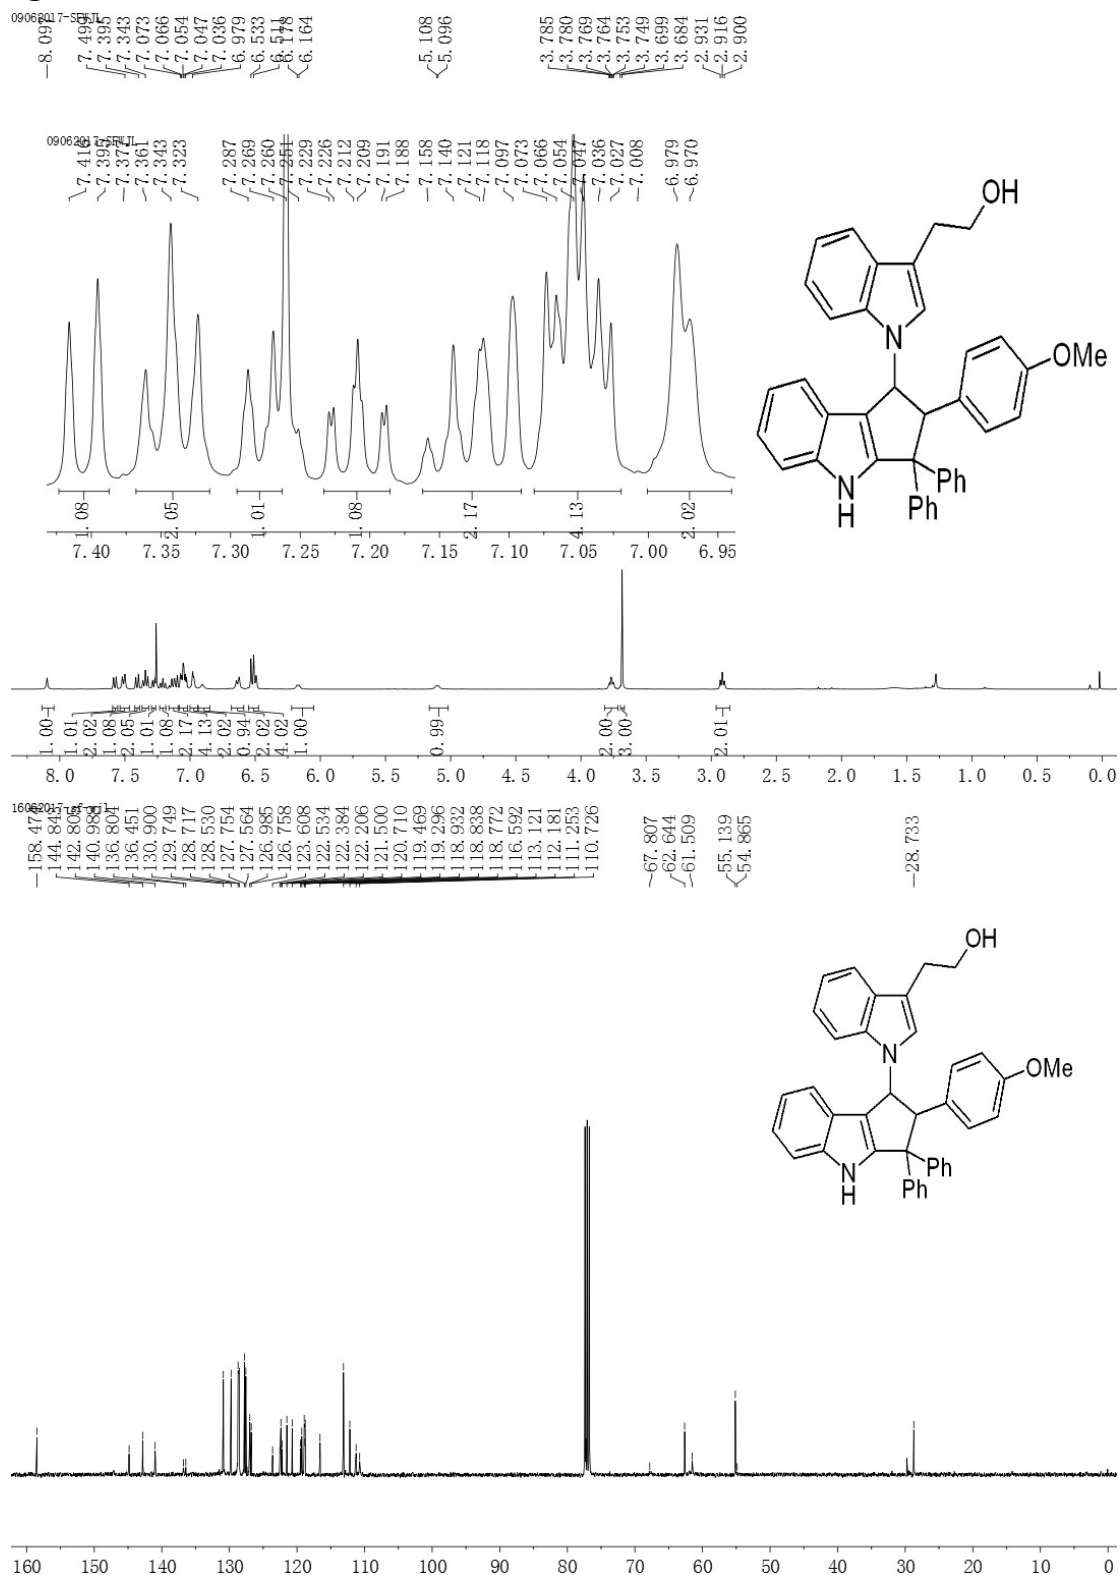

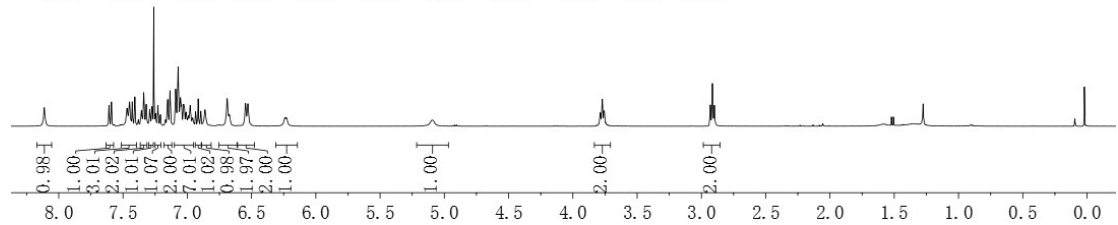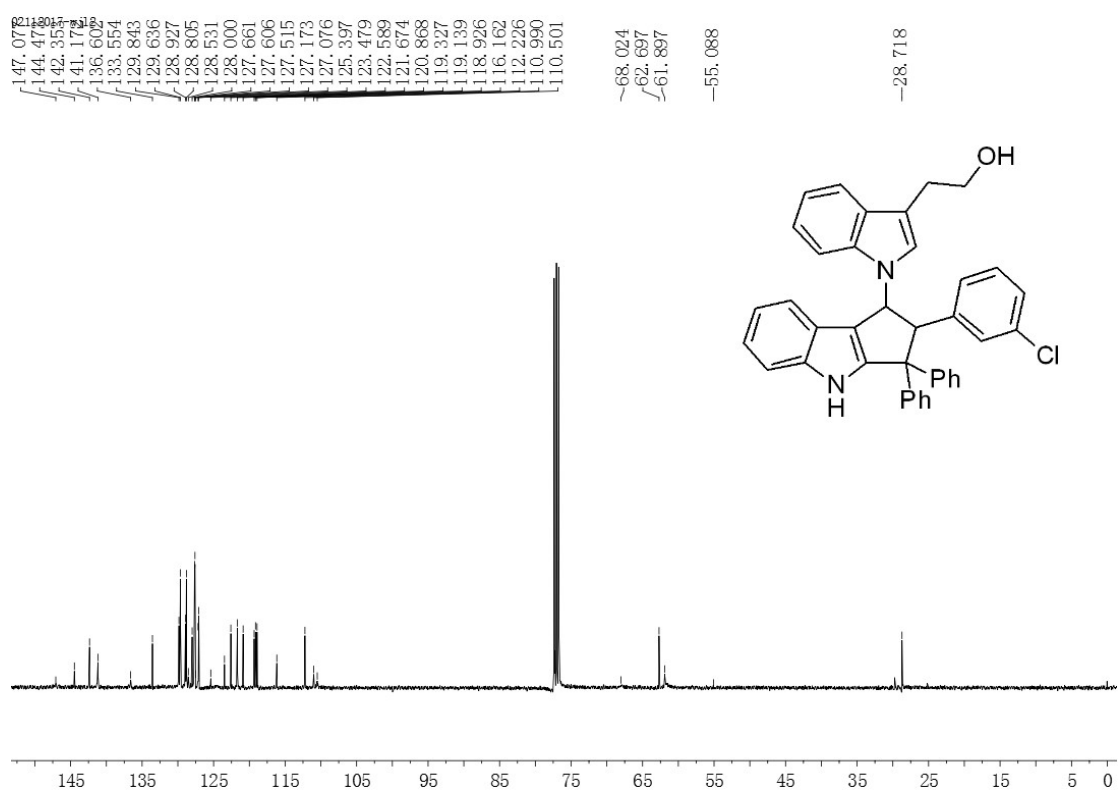

# 3ia

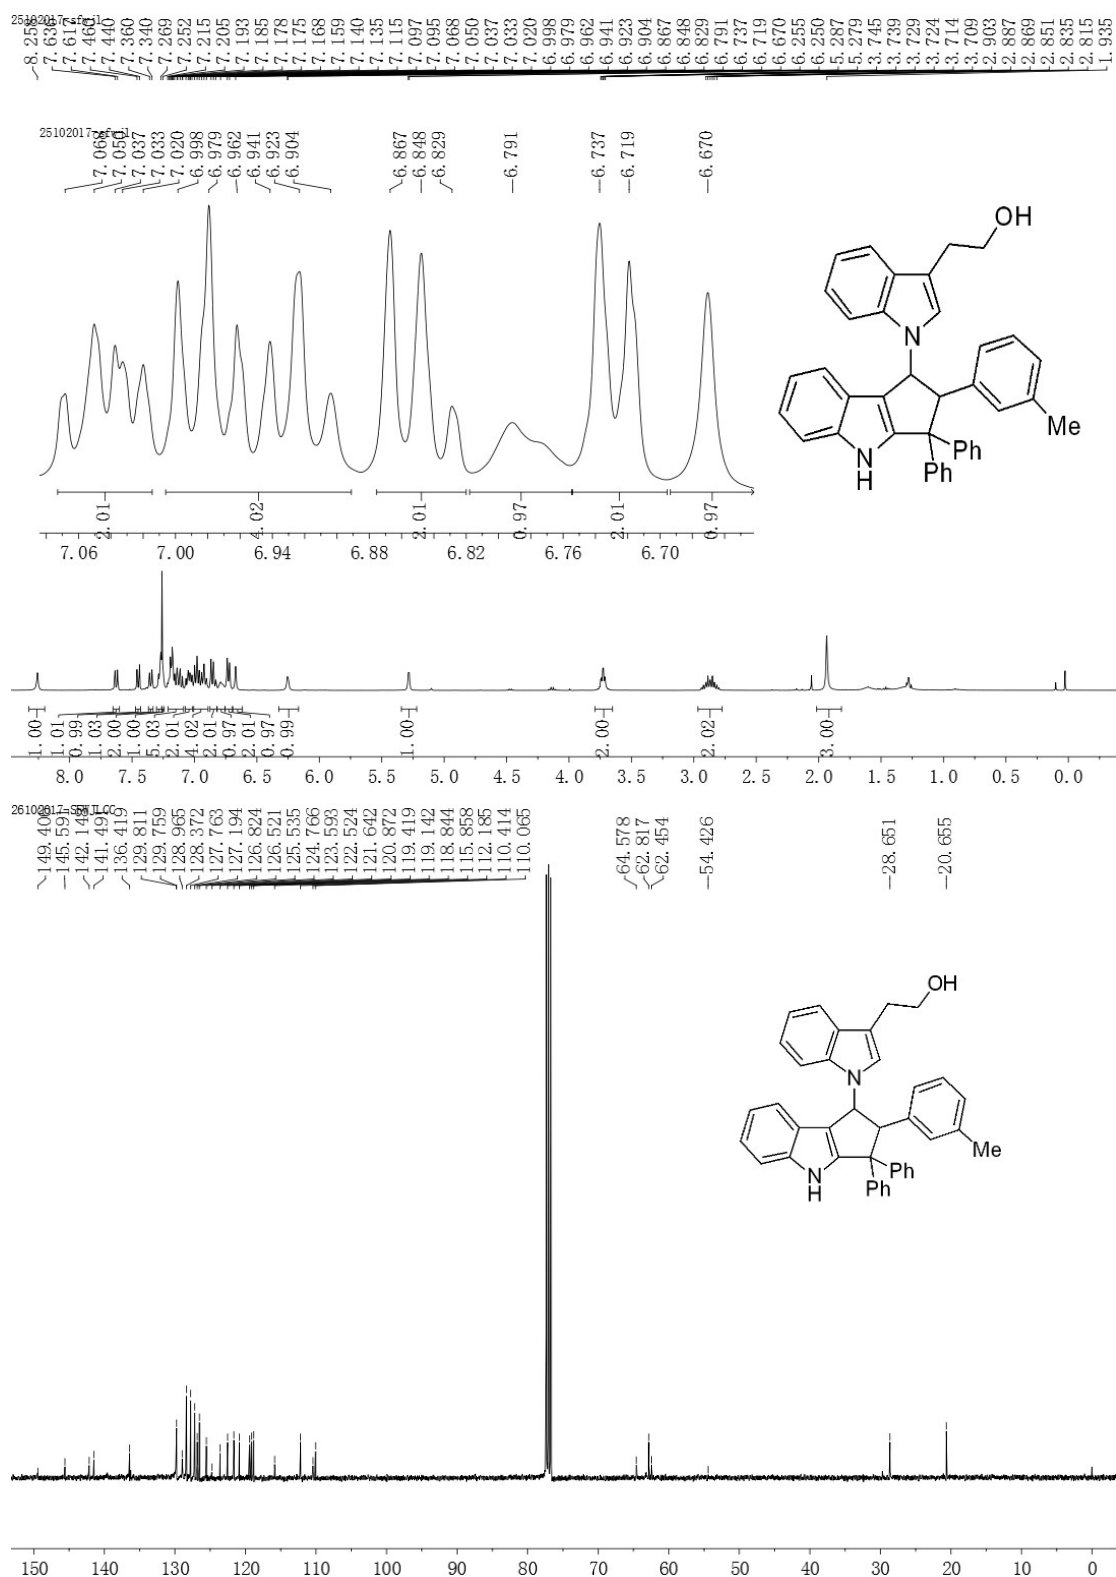

# 3ja

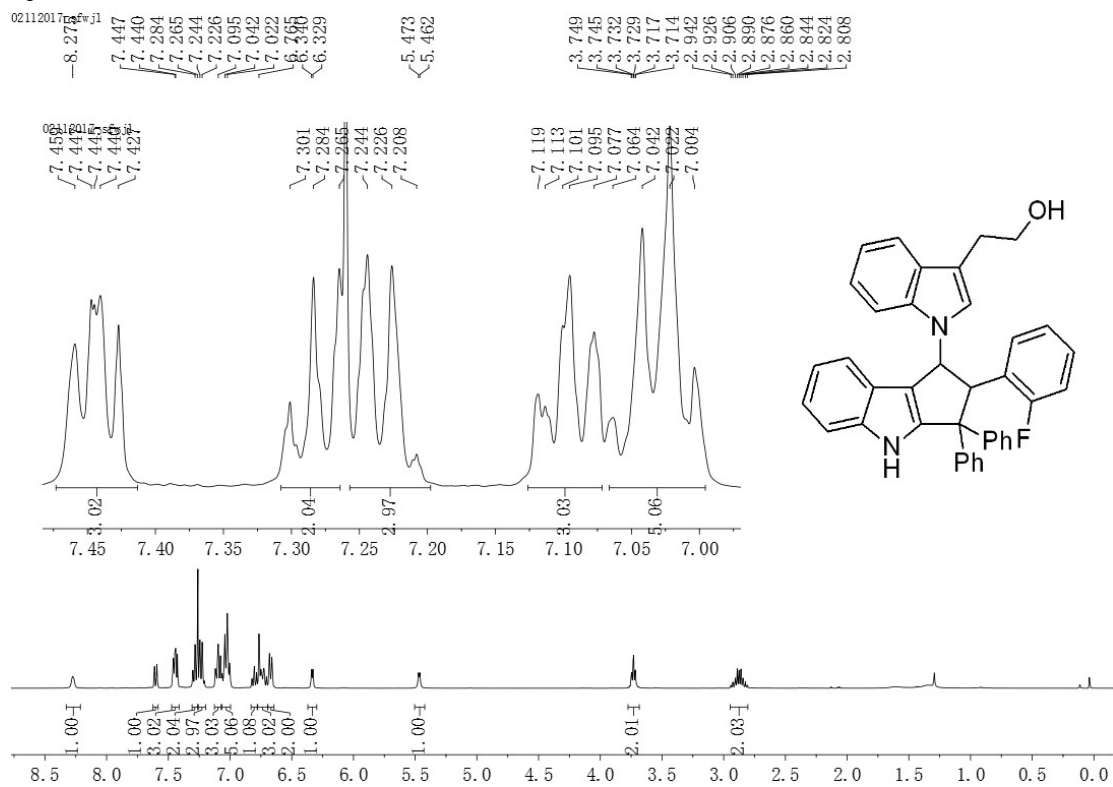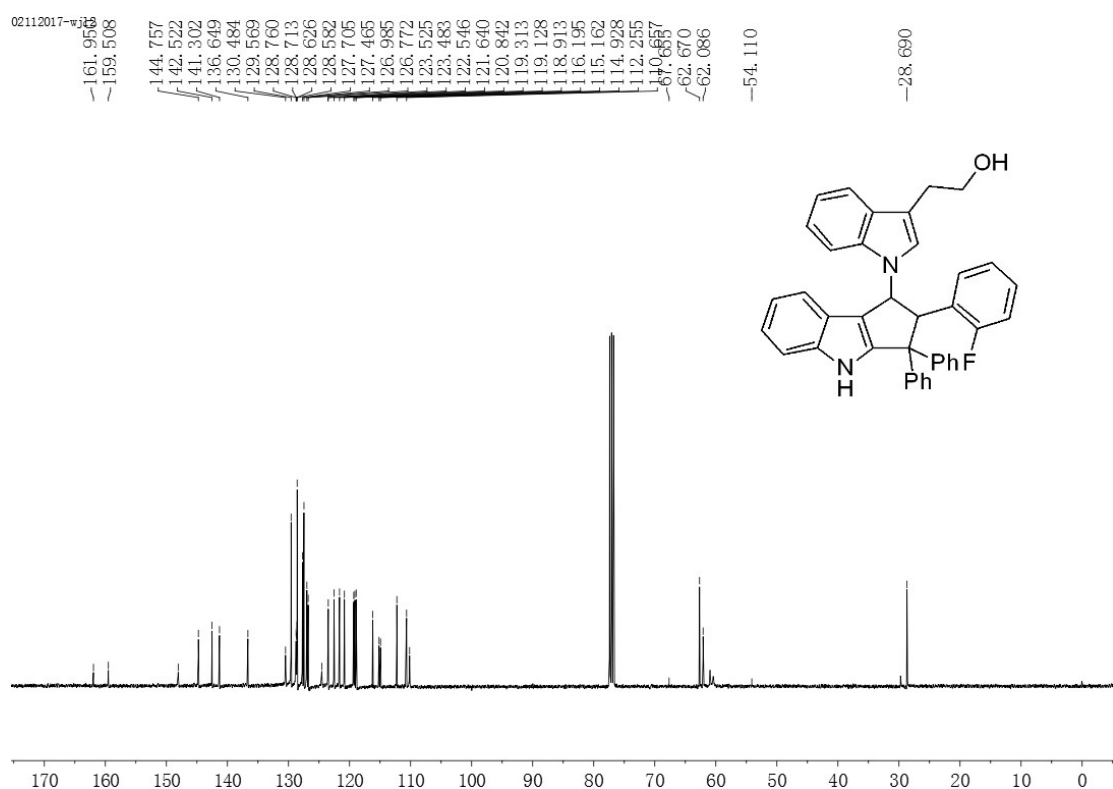

3ka

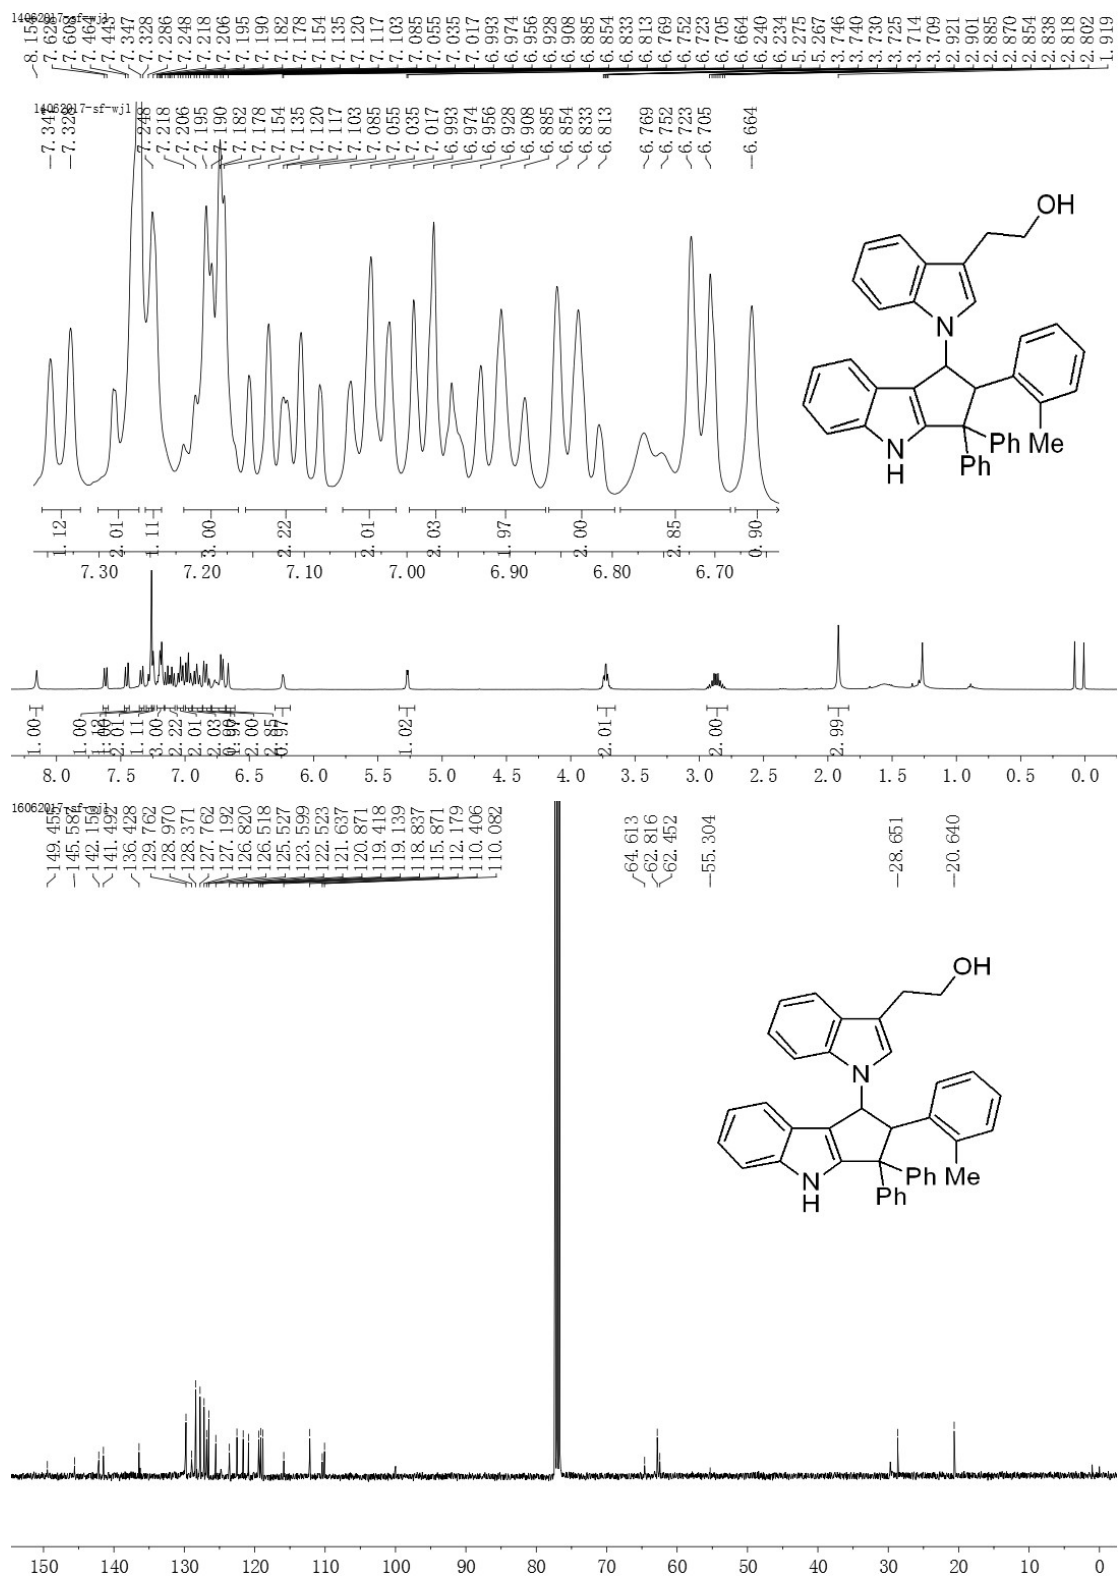

# 3la

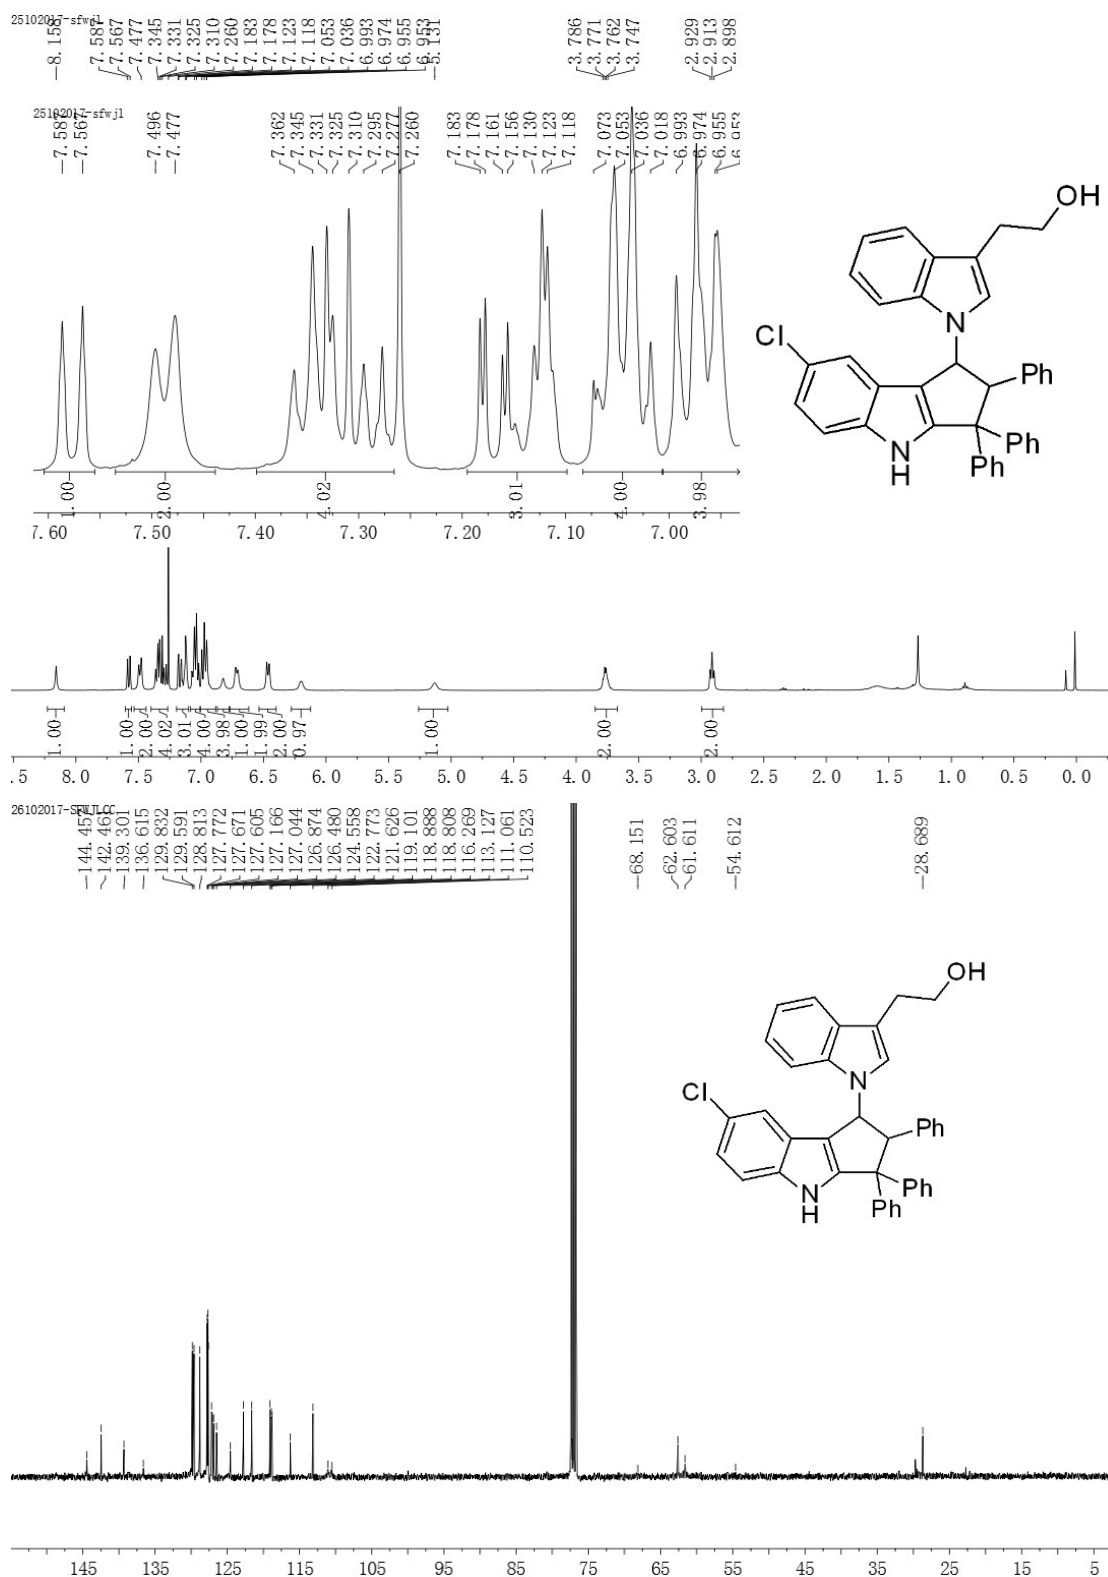



[illegible]

### 3na

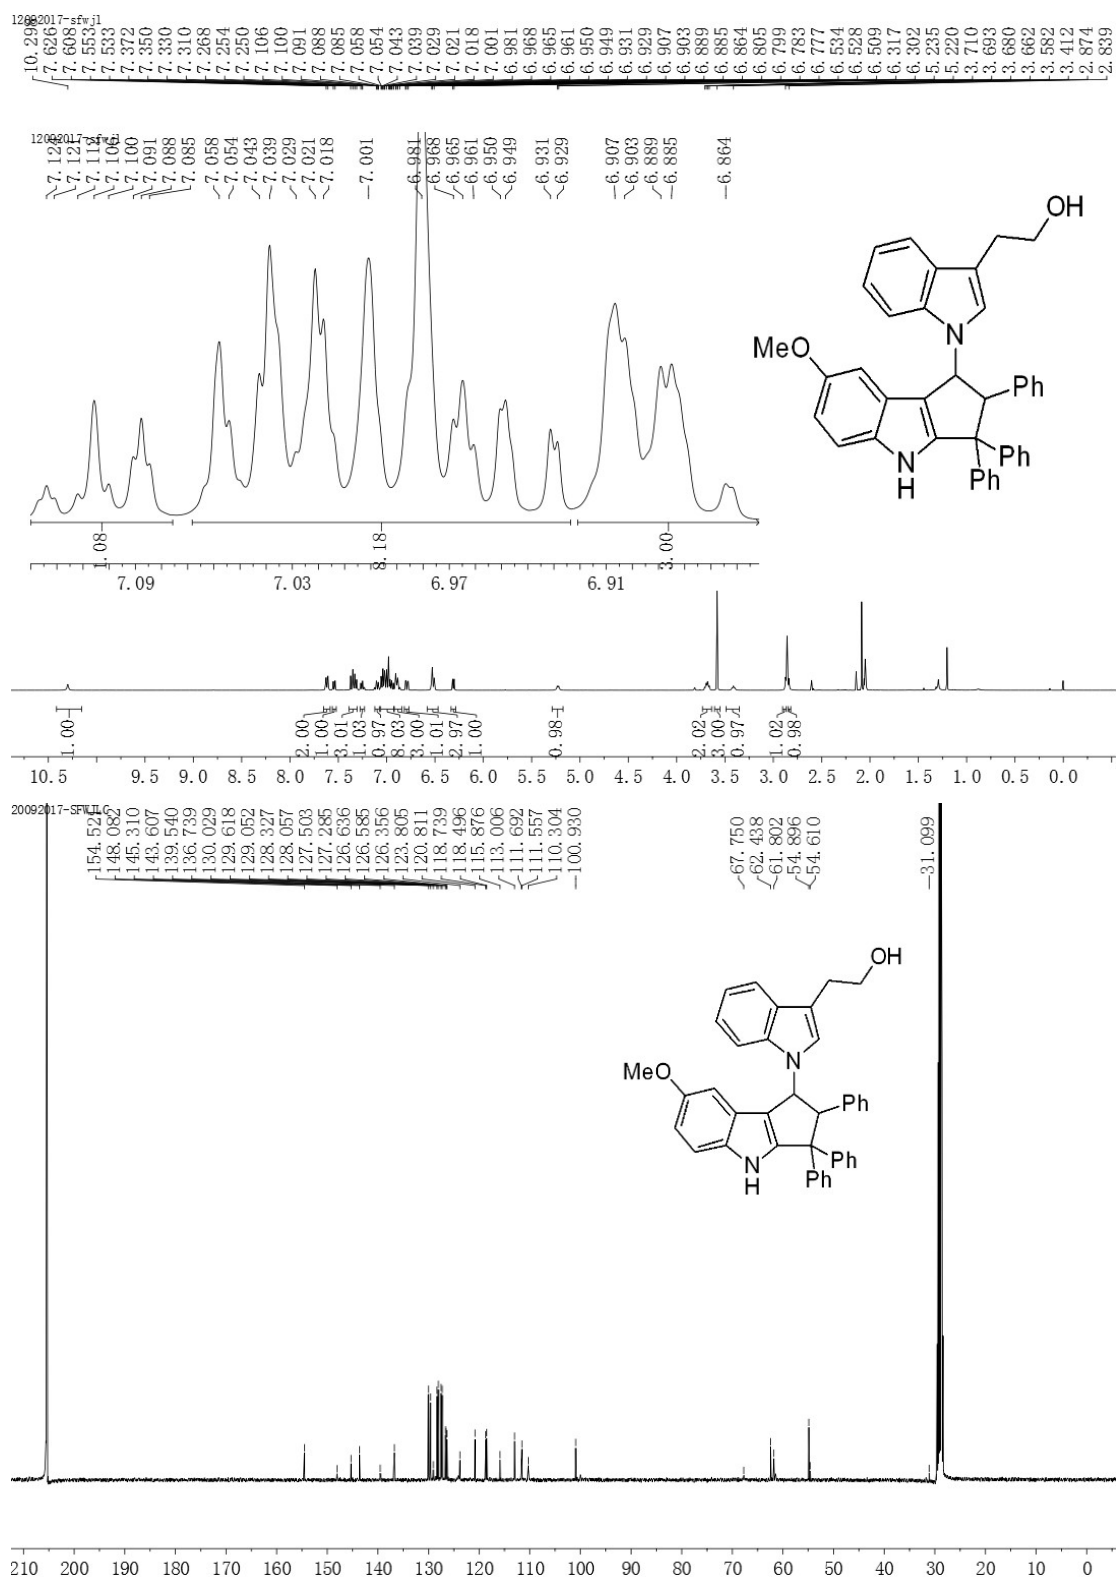

25102017sfwjlc

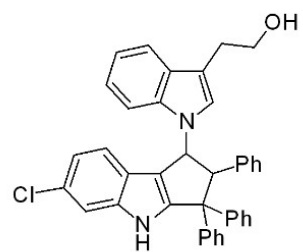



# 3ab

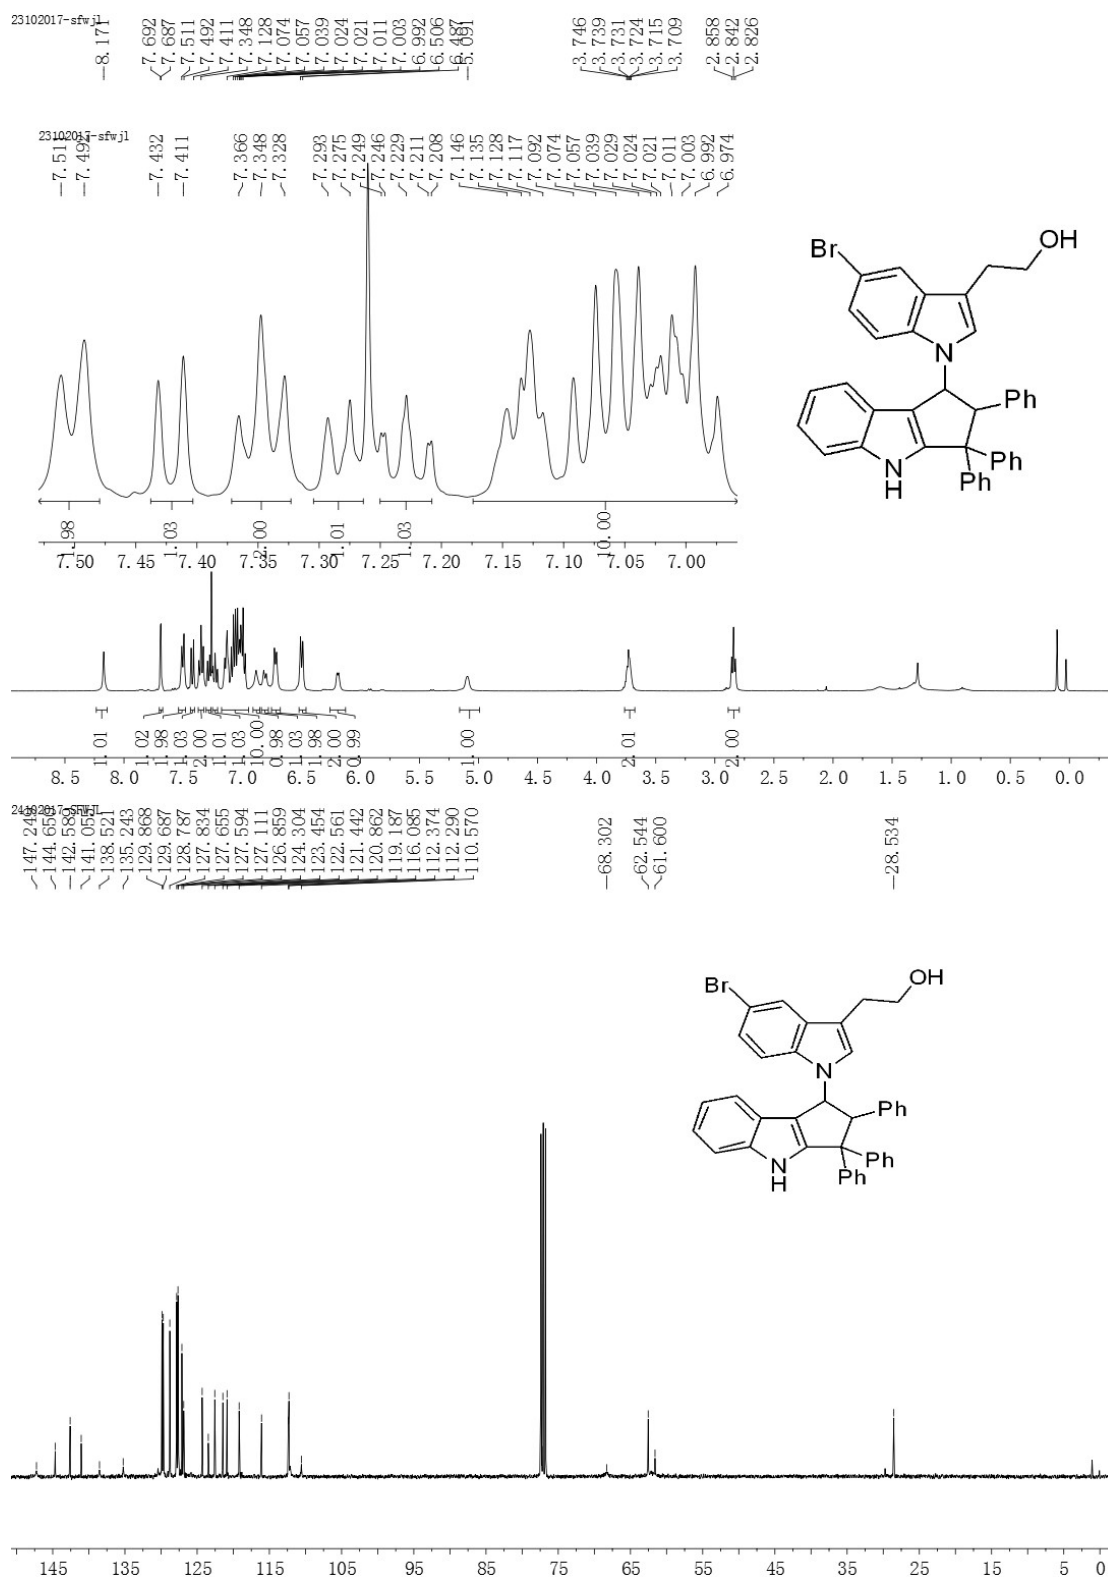

# 3ac

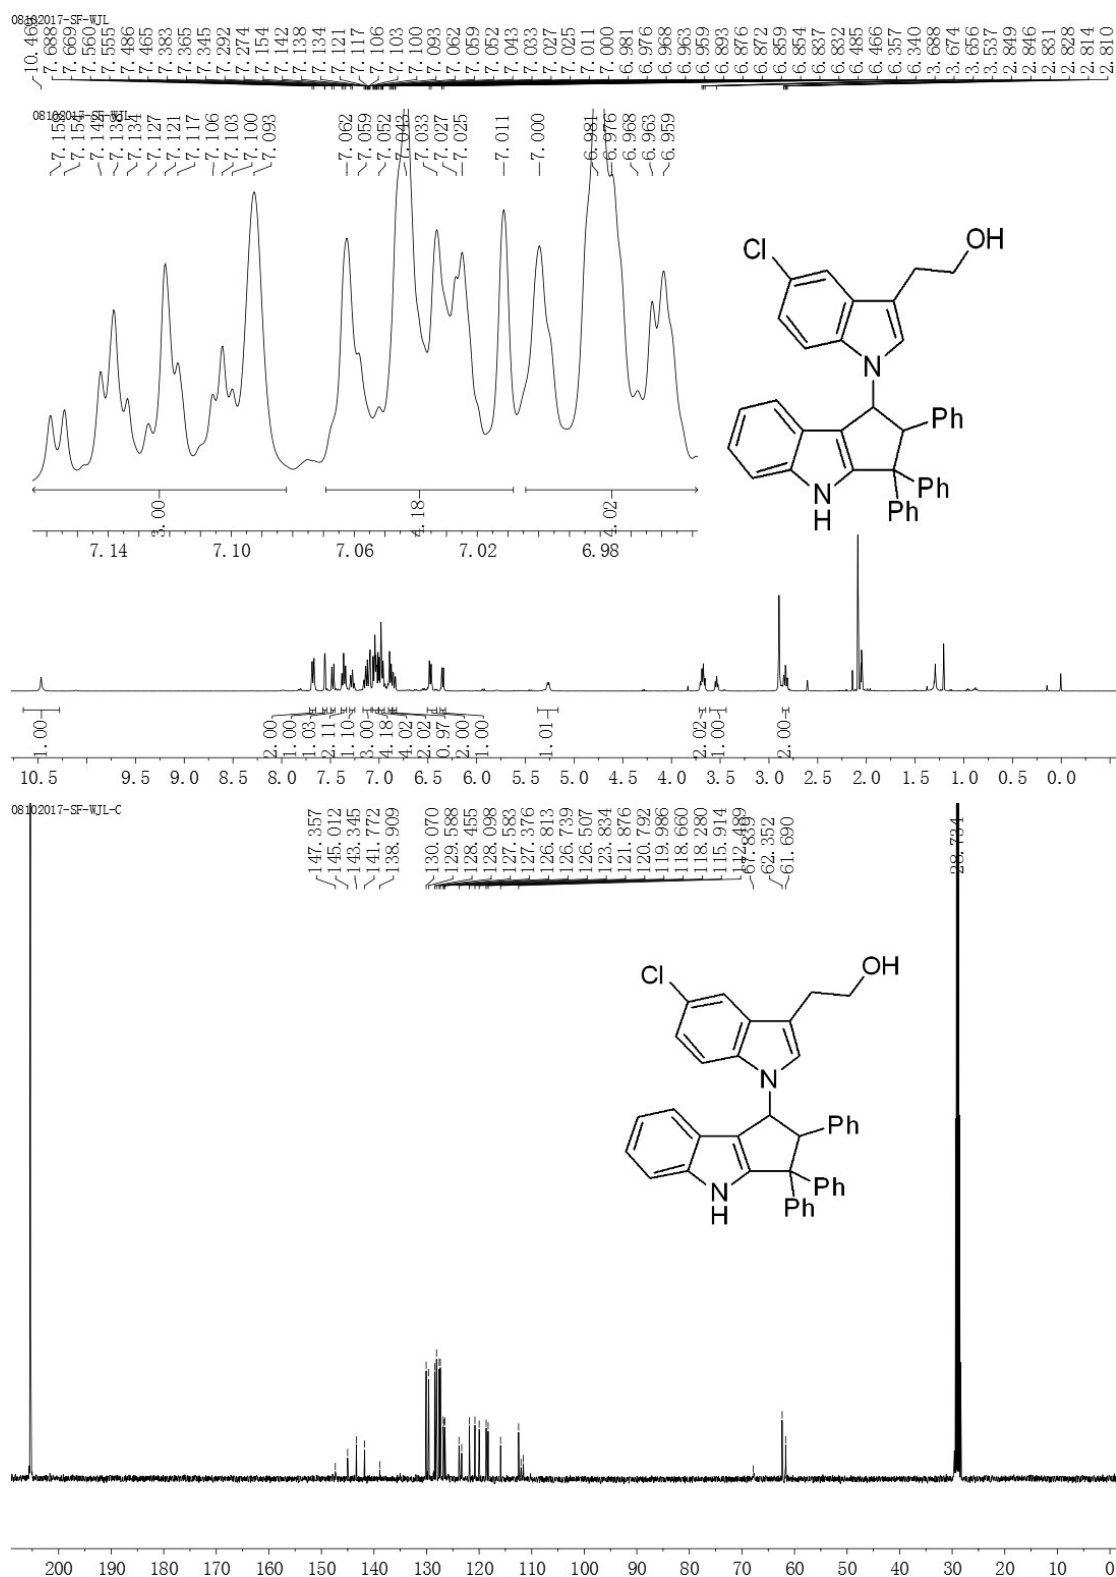

### 3ad

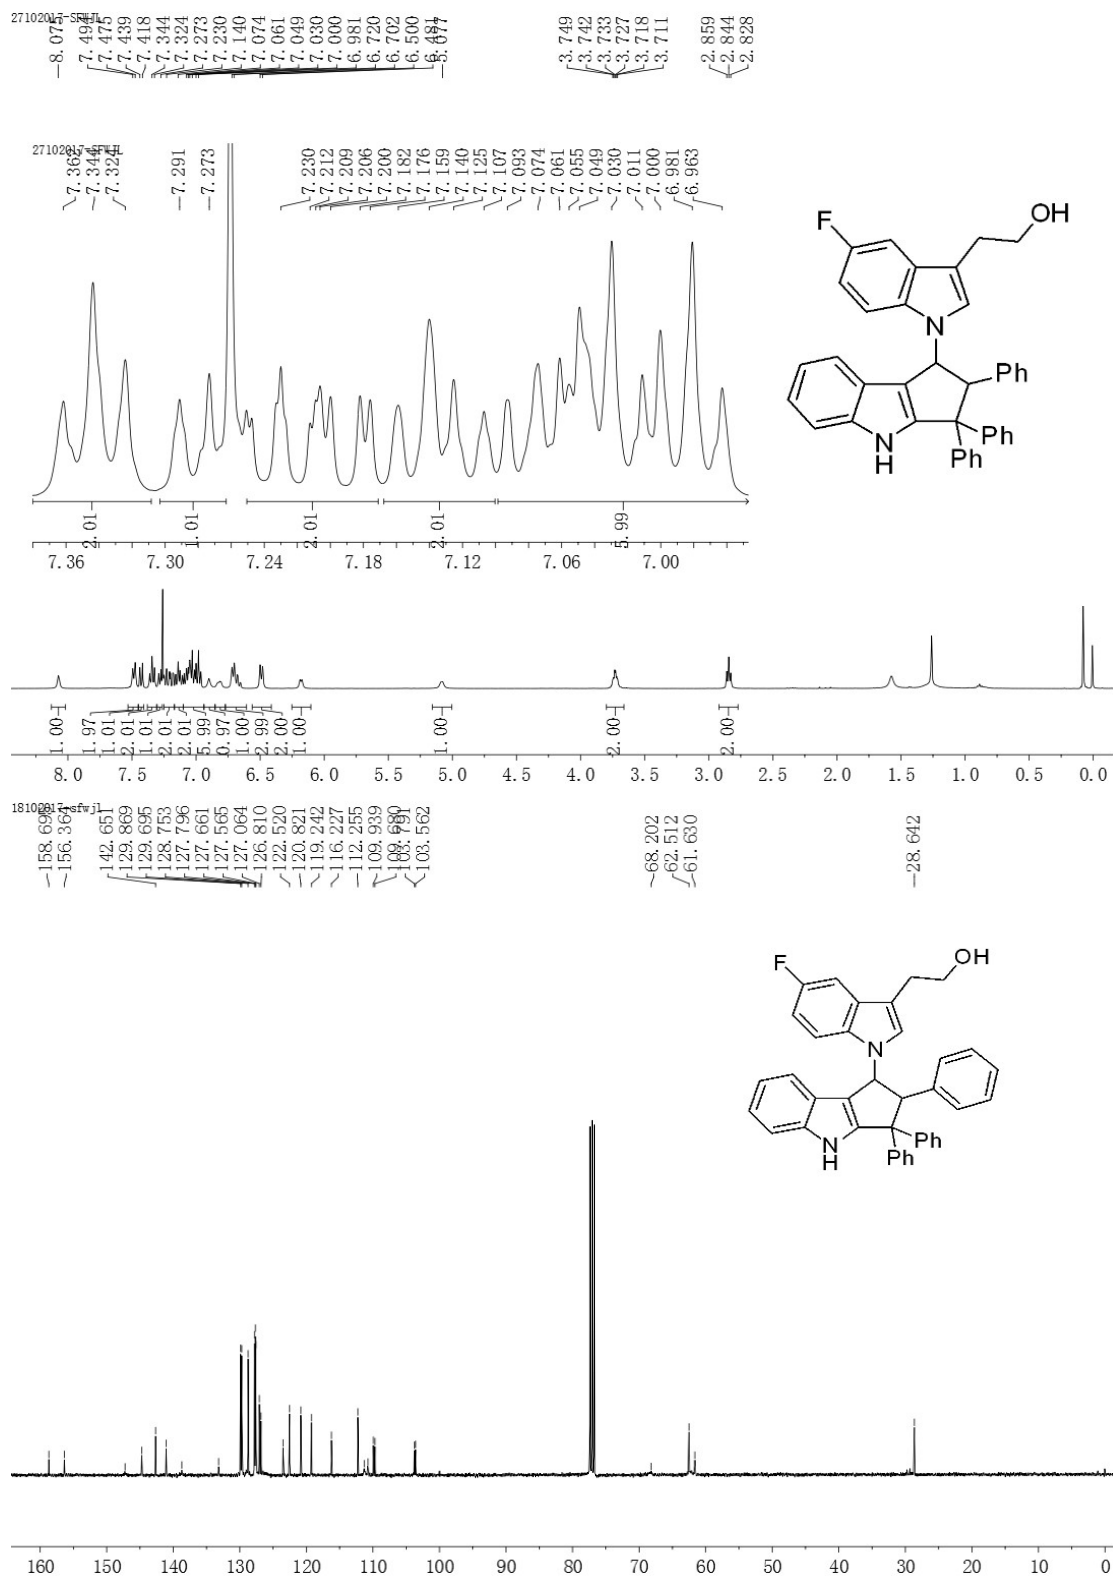

# 3ae

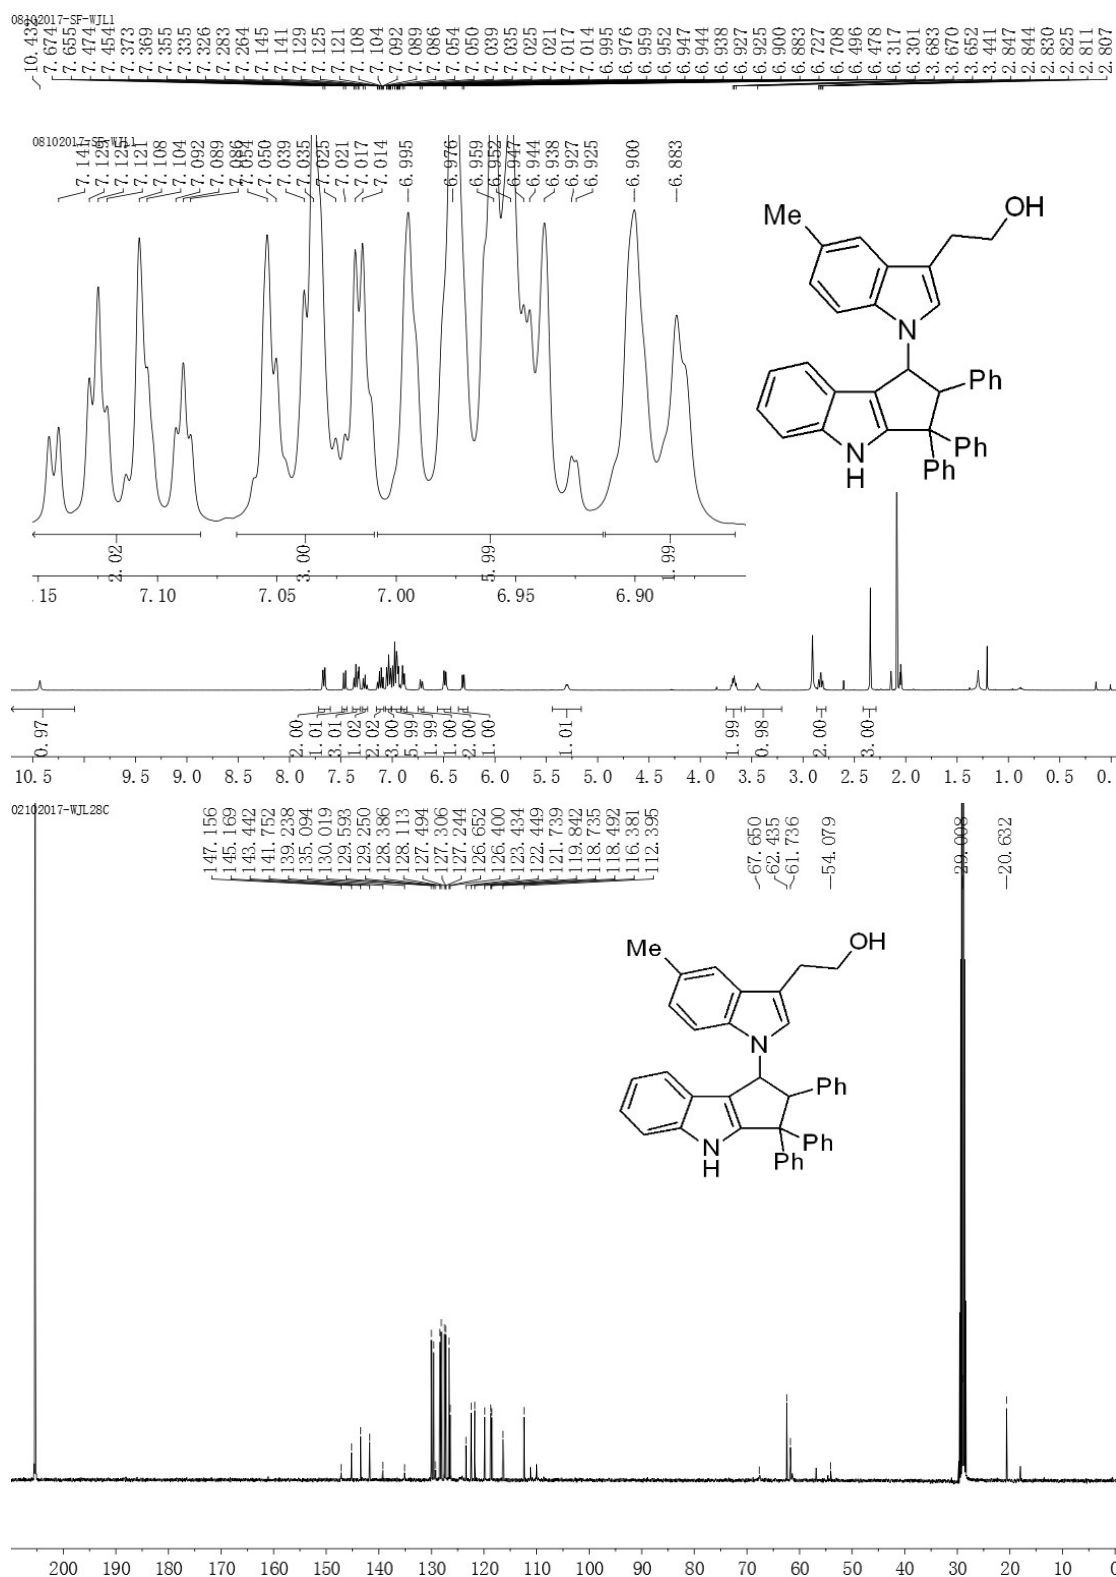





02112017  
8.08

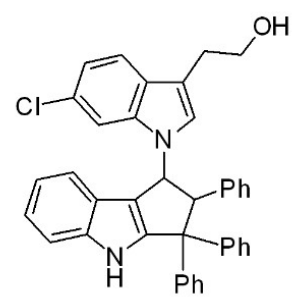

### 3ah

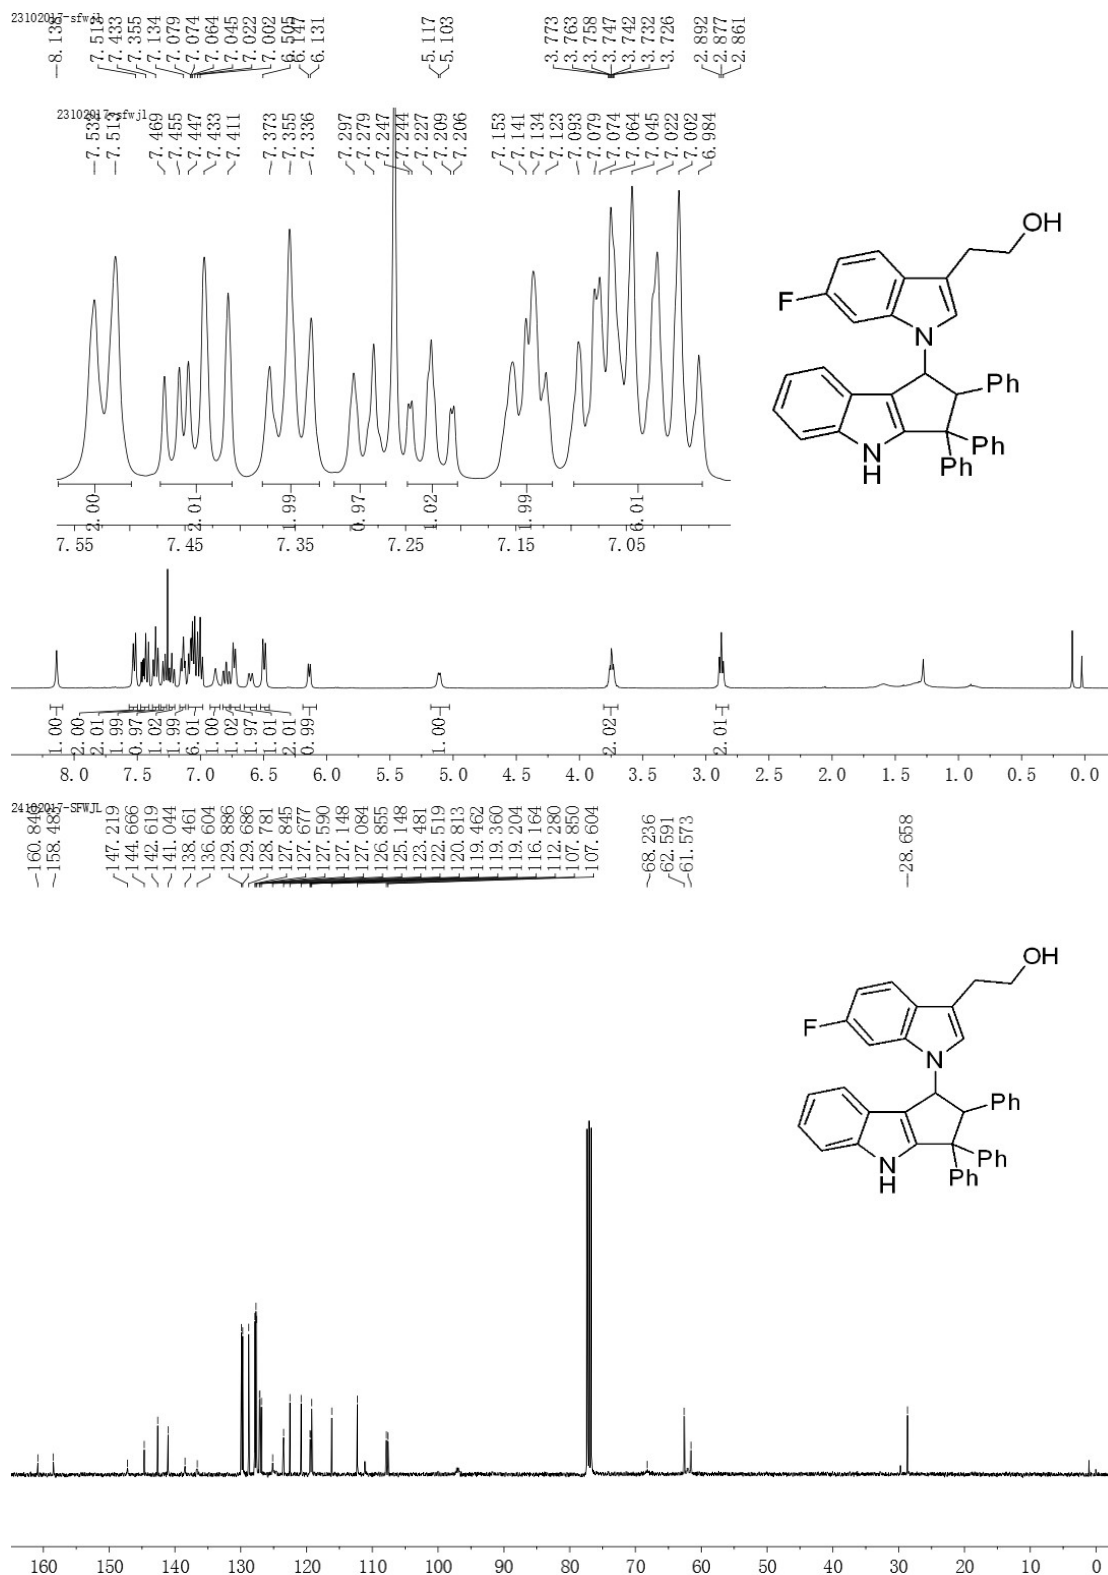

### 3ak

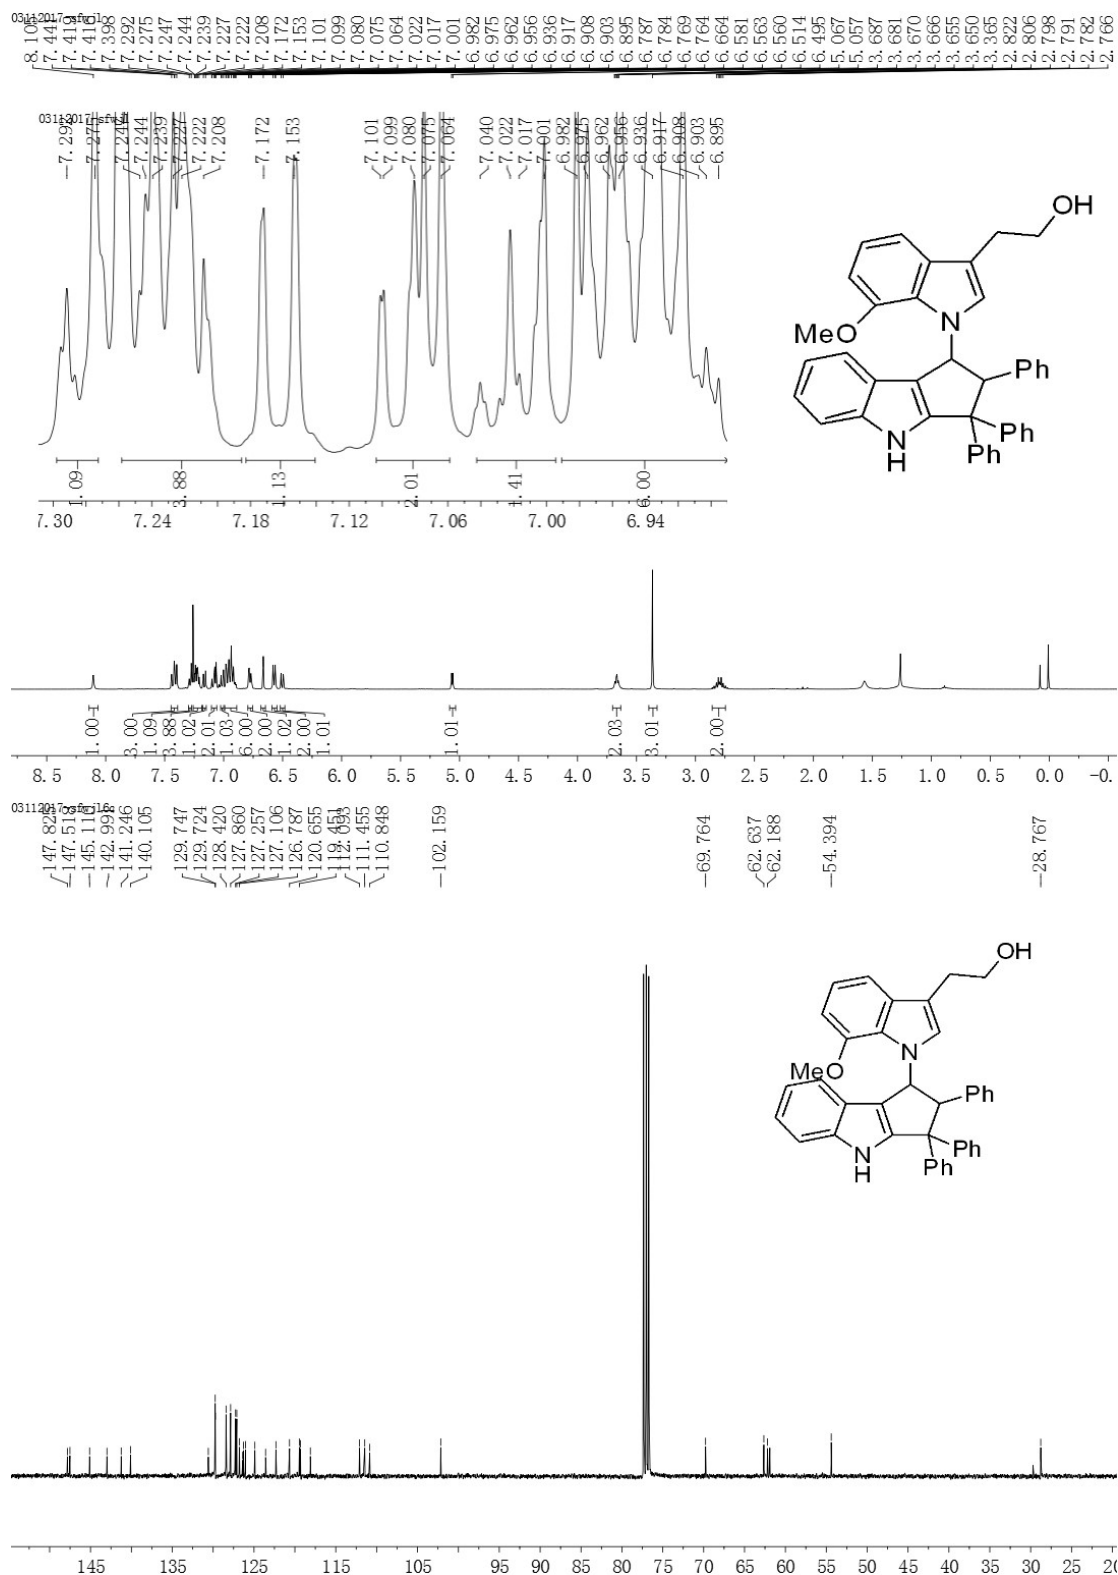

# 3al

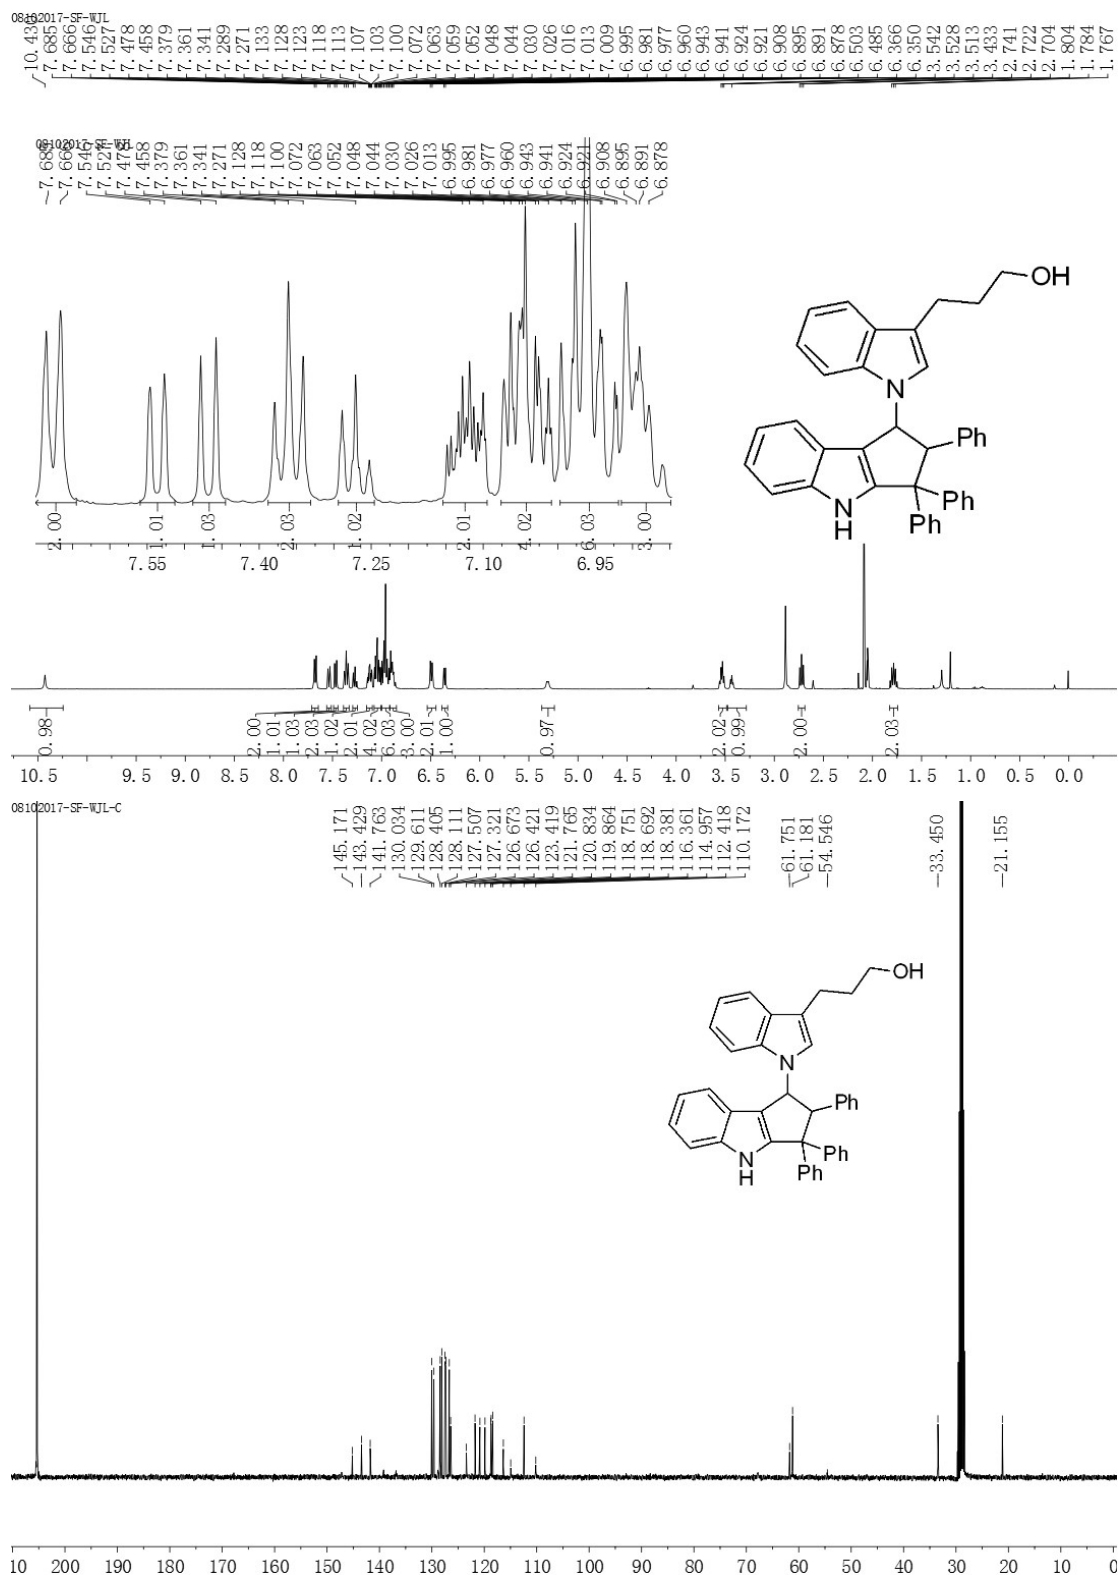

# 4aa

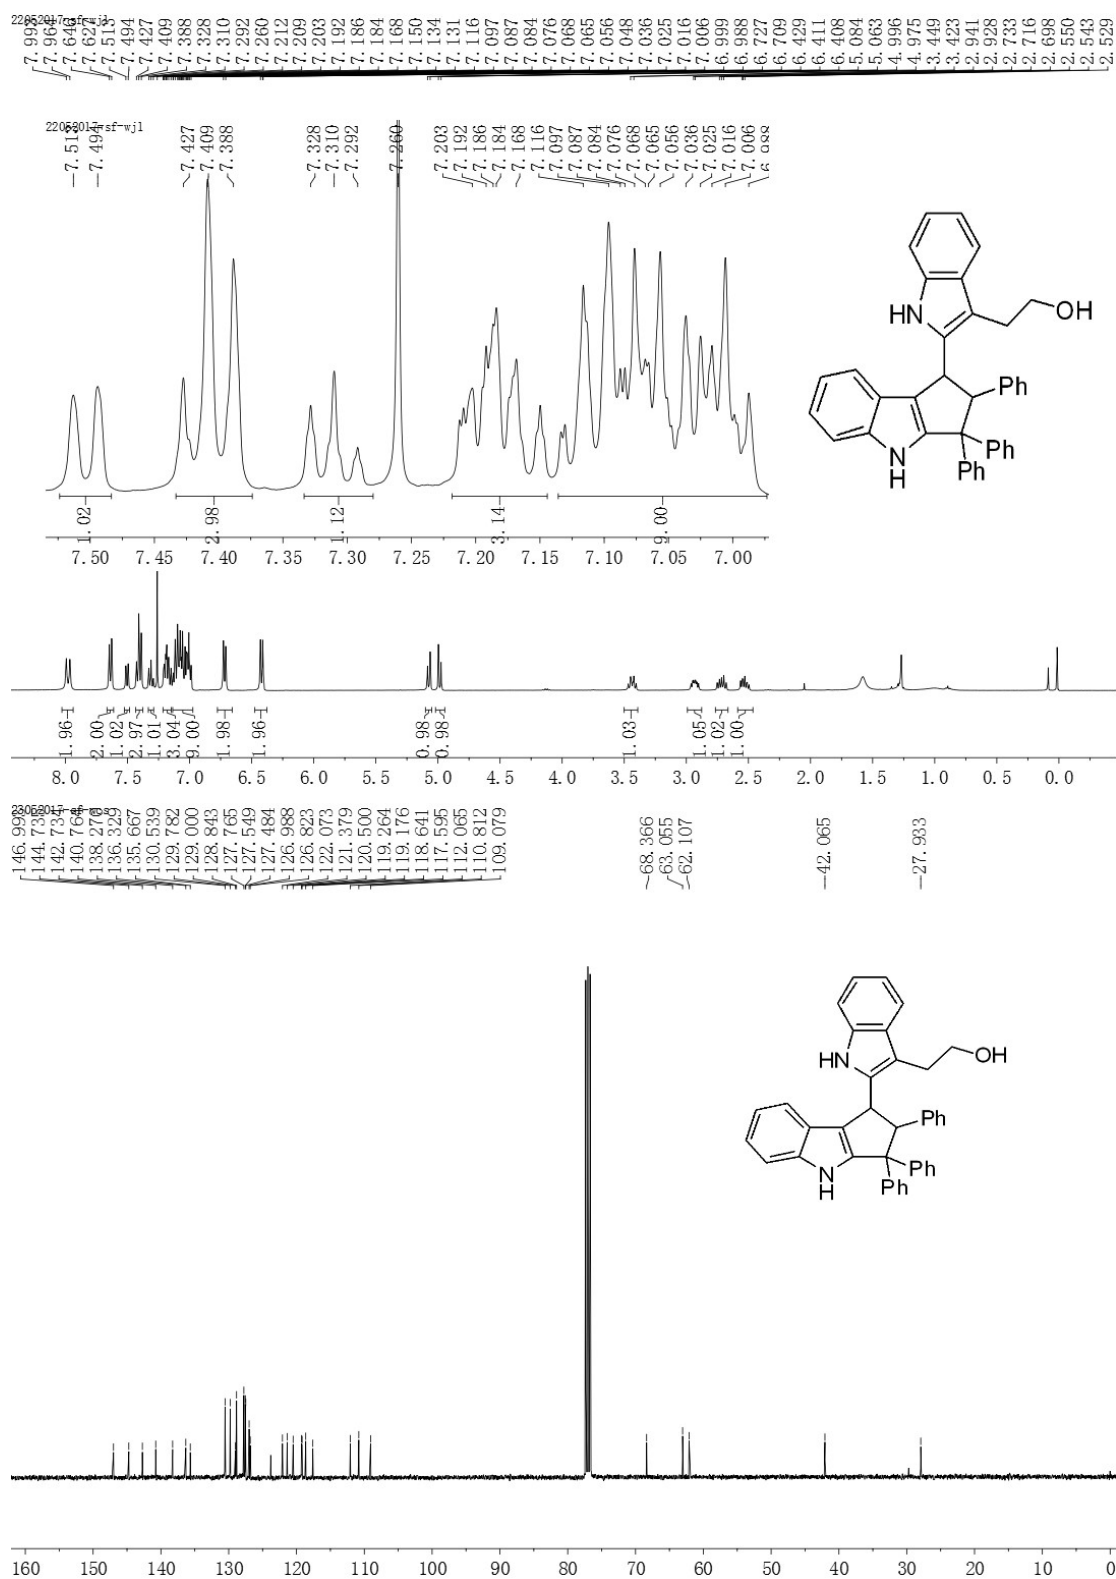

## S27

12692017-sfw.jl

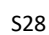



# 4da

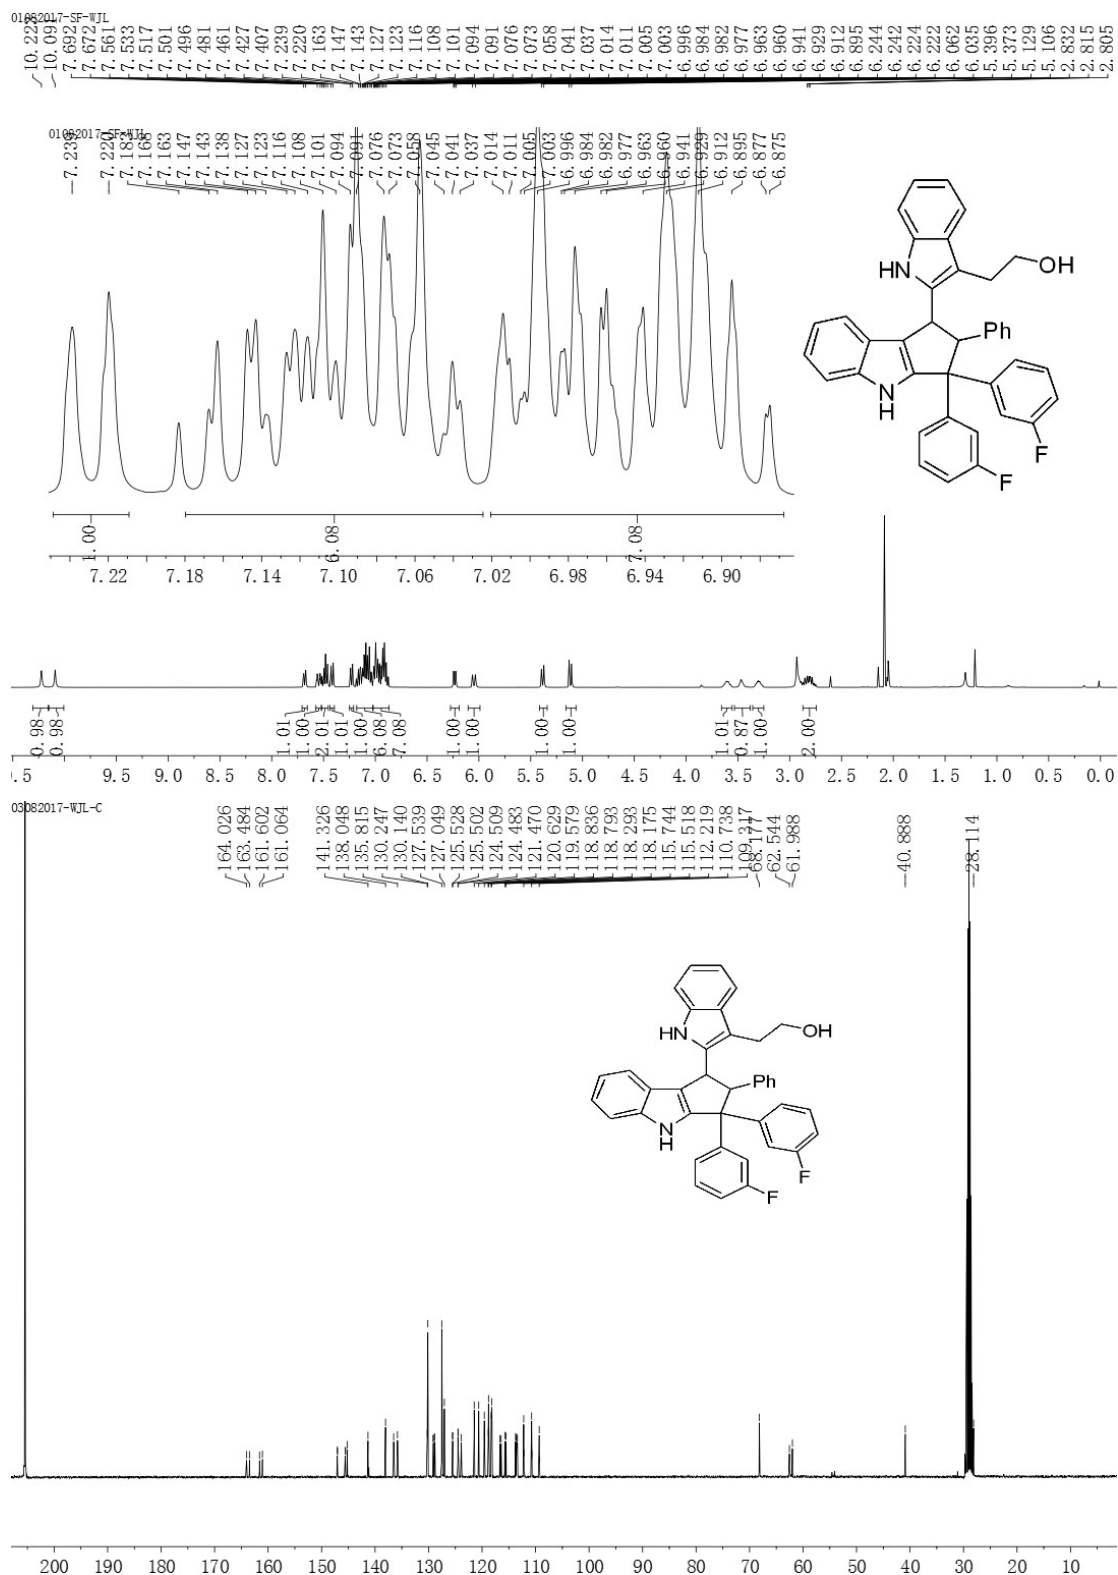

# 4fa

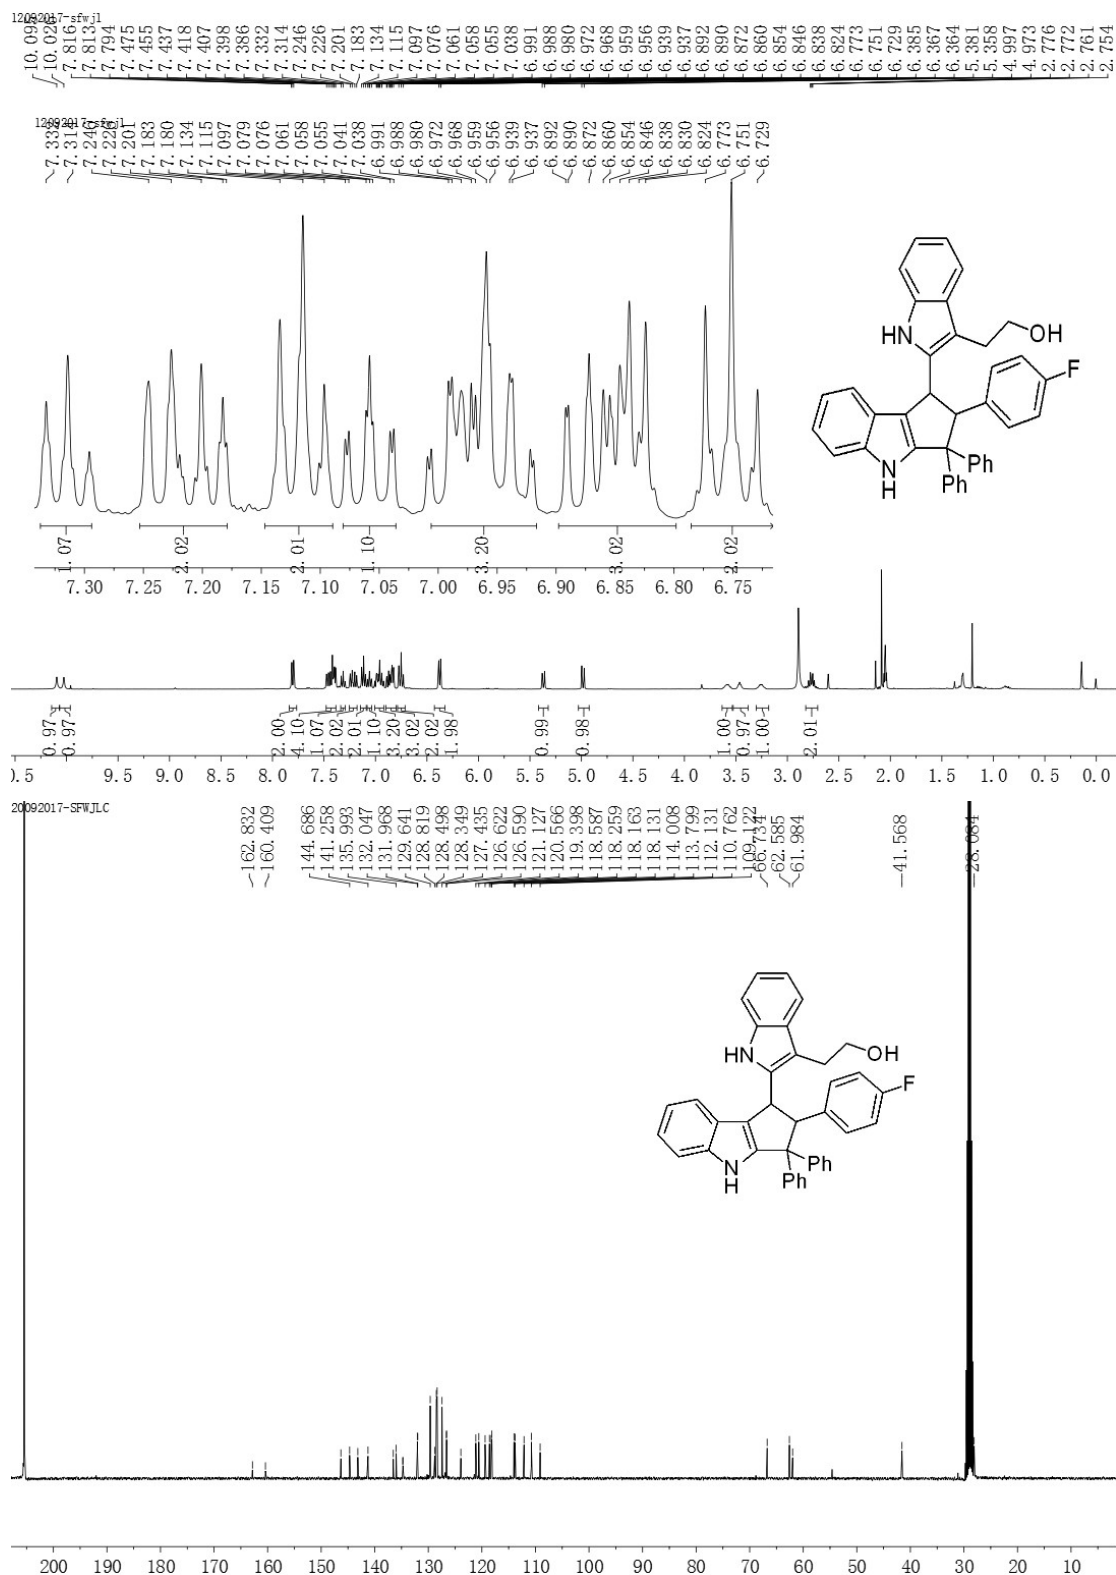

# 4ha

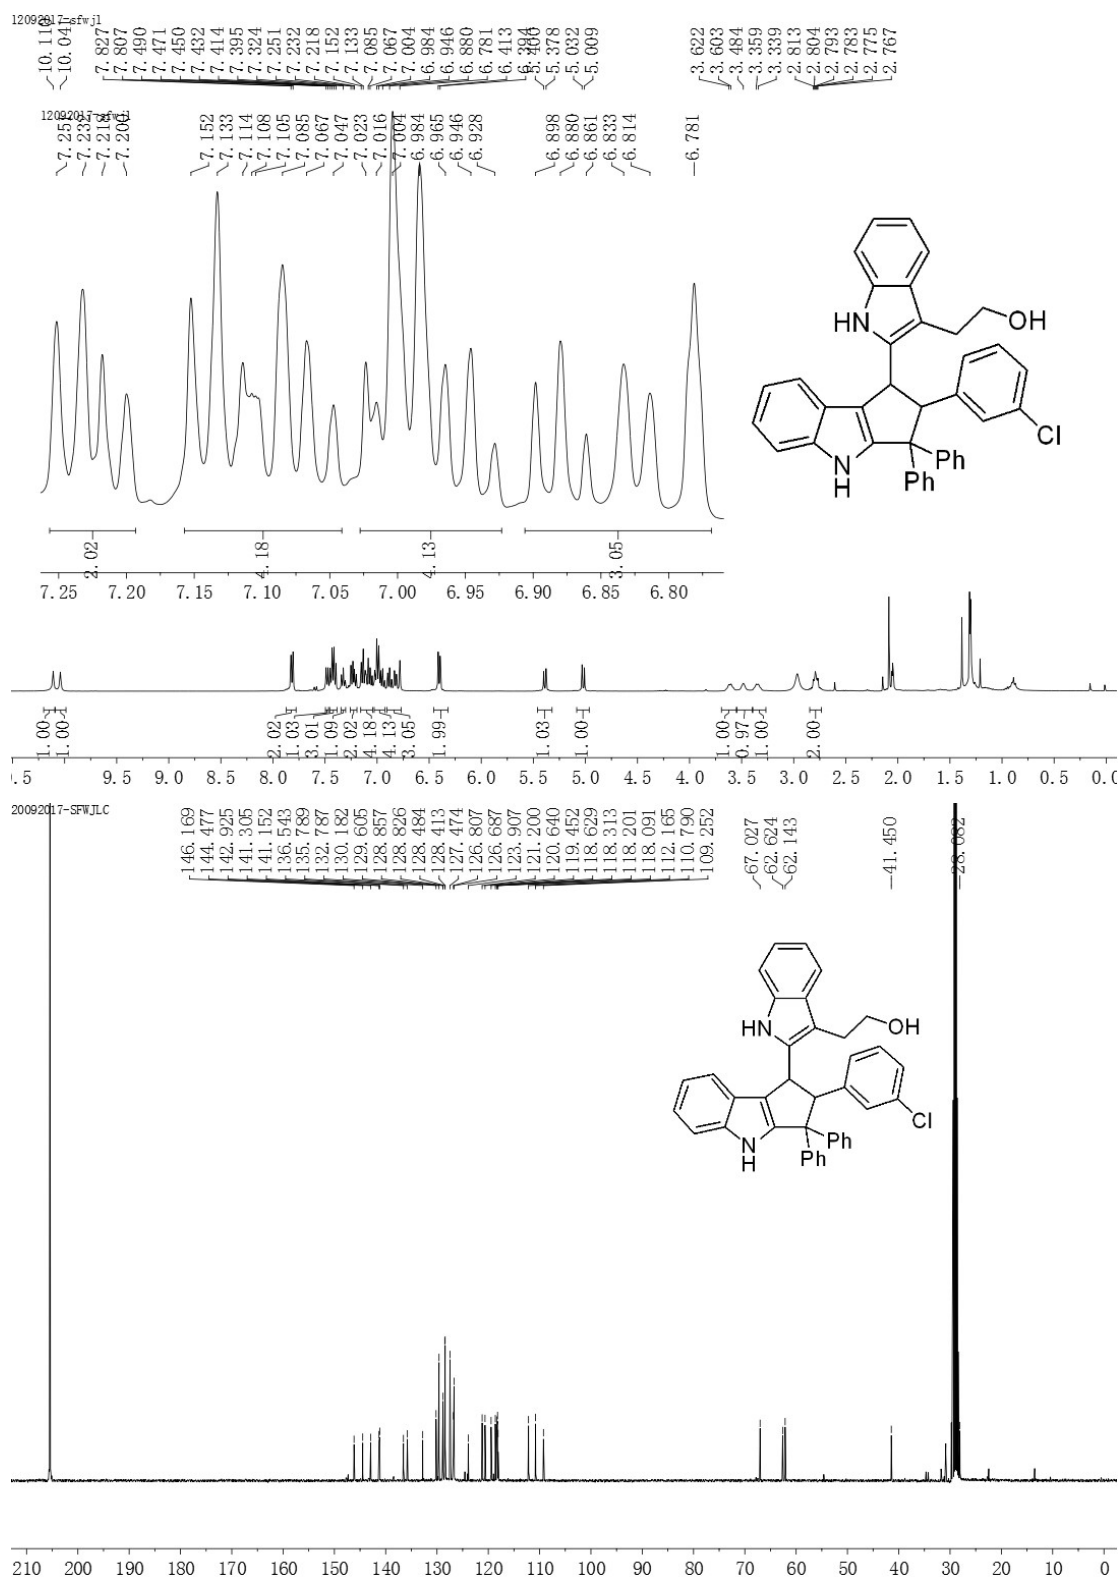

20160205

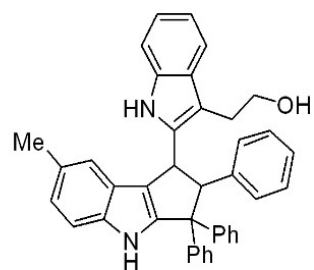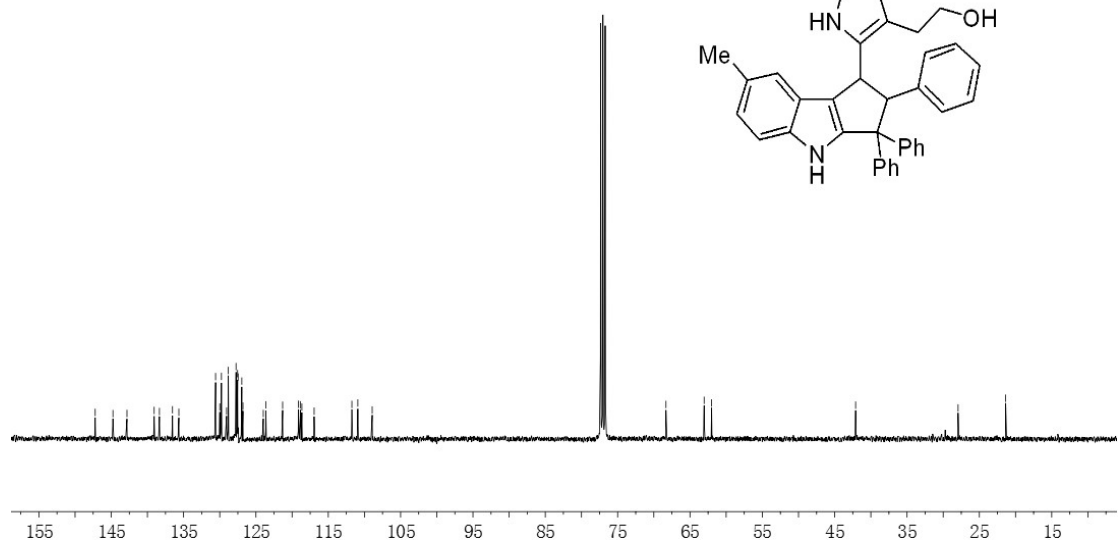

# 4na

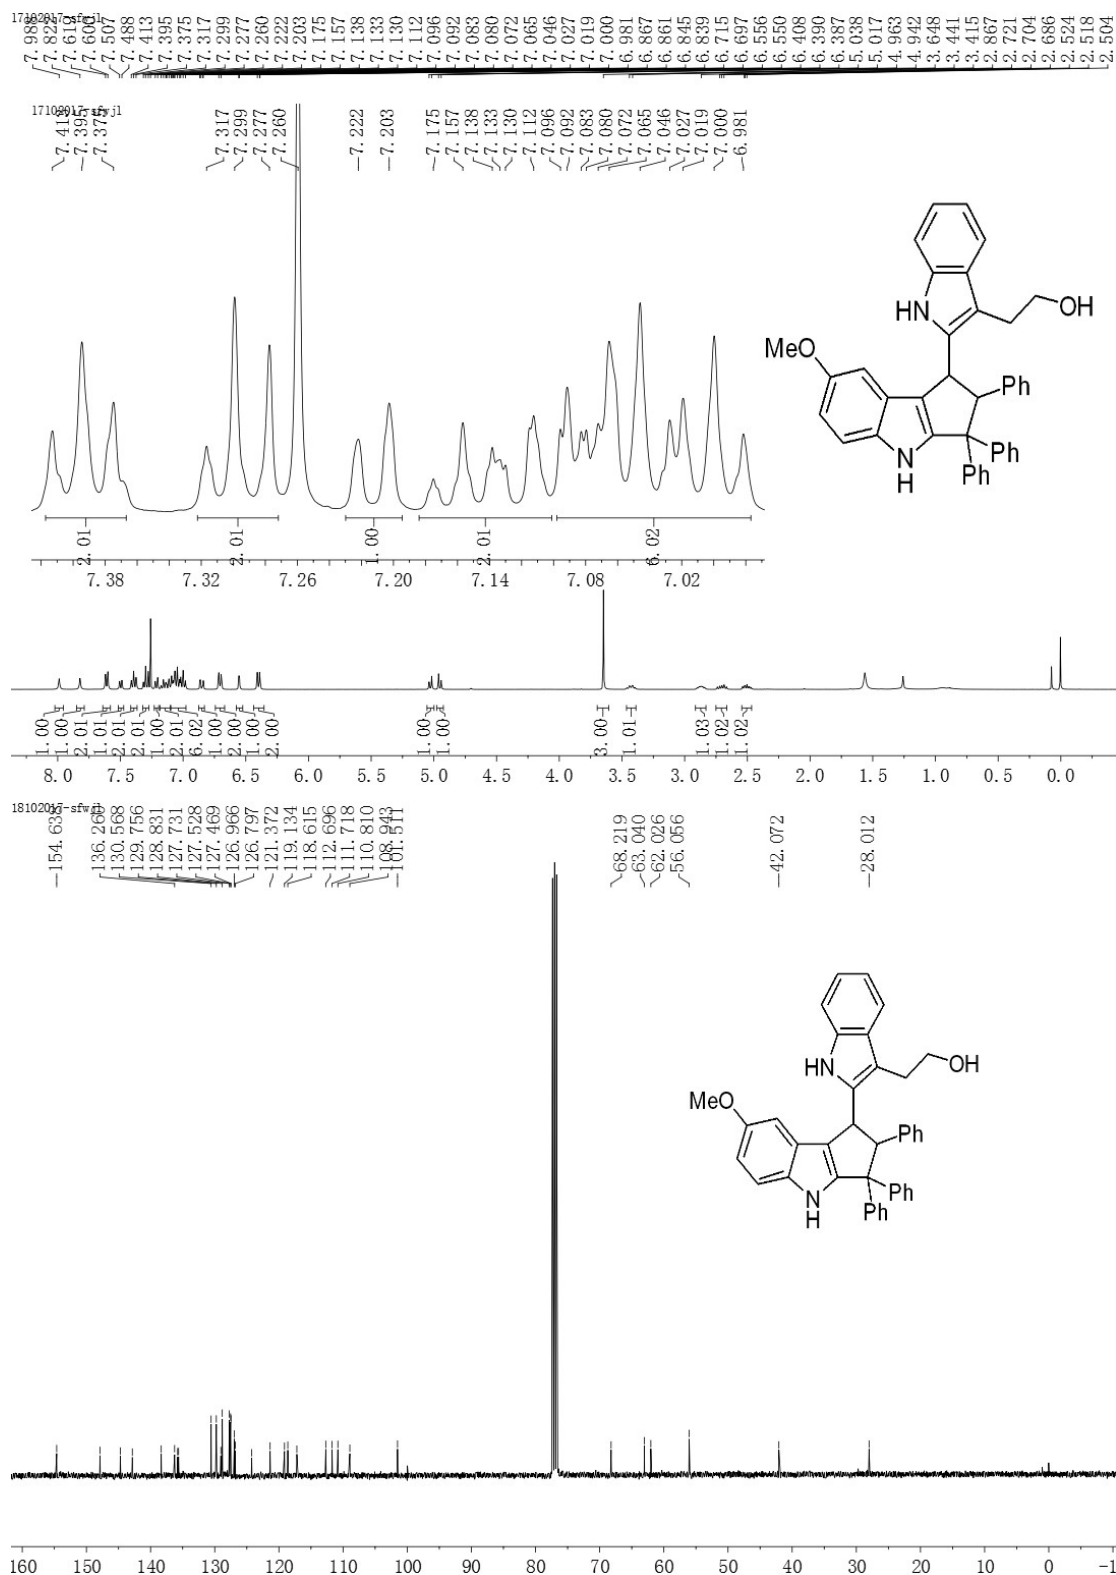

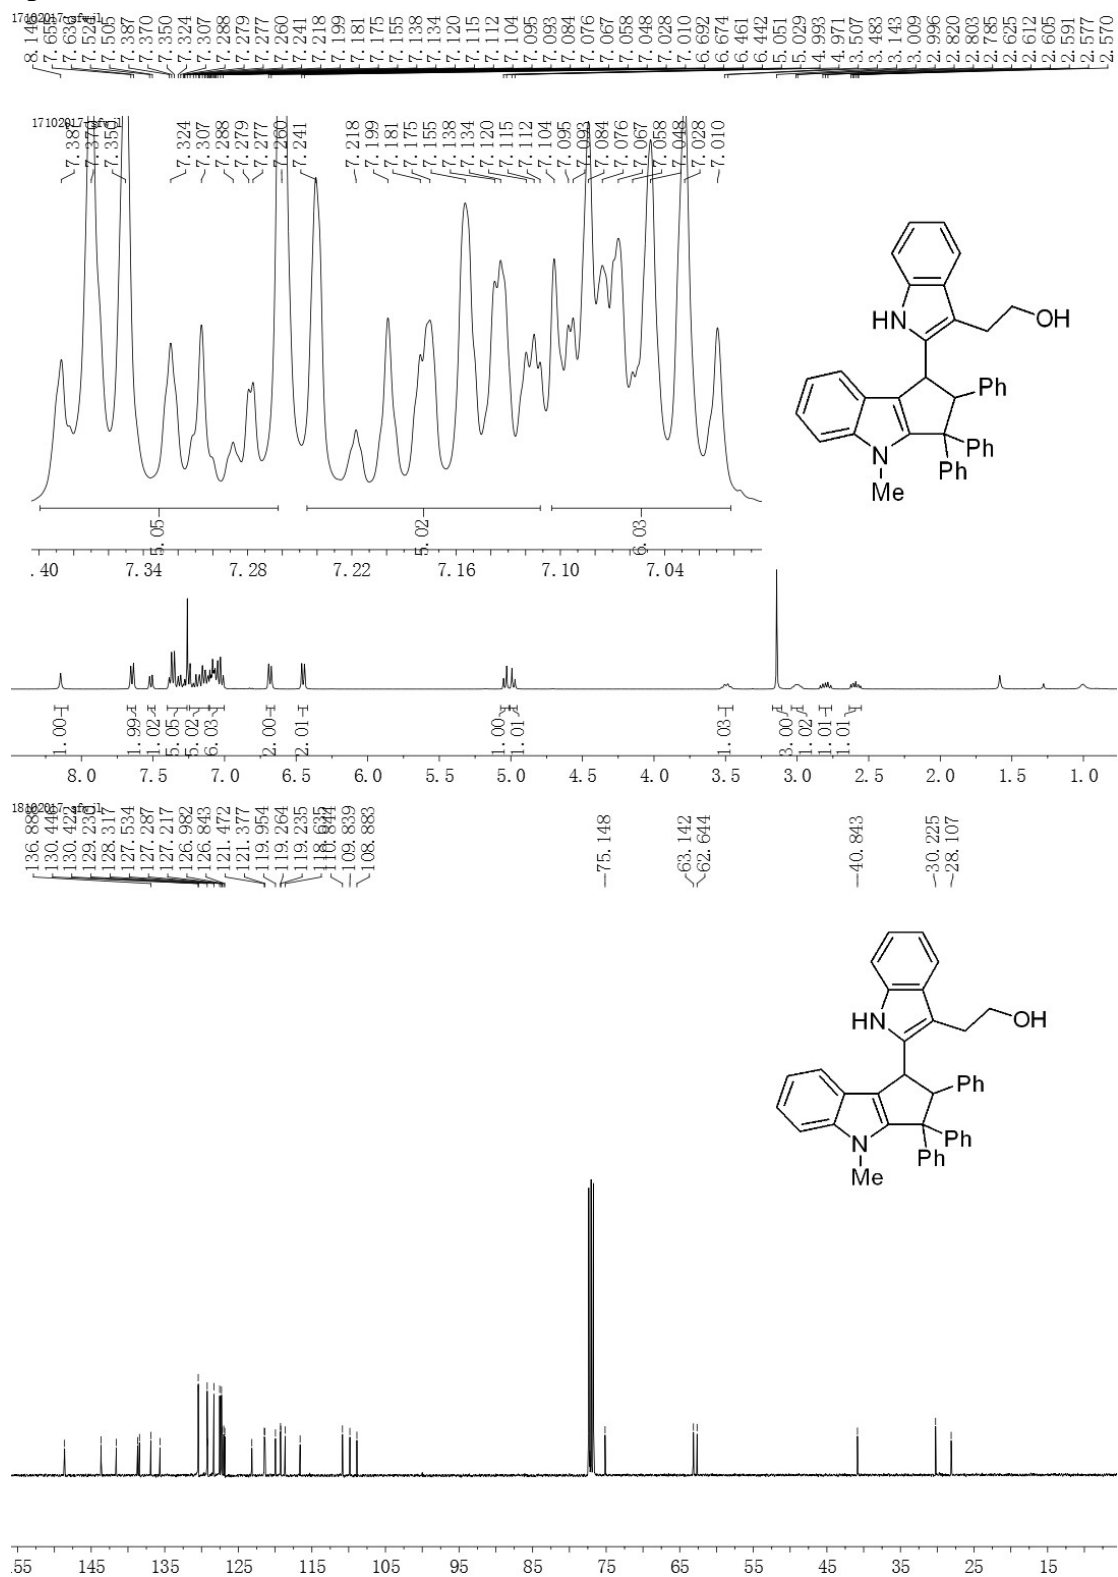

# 4ac

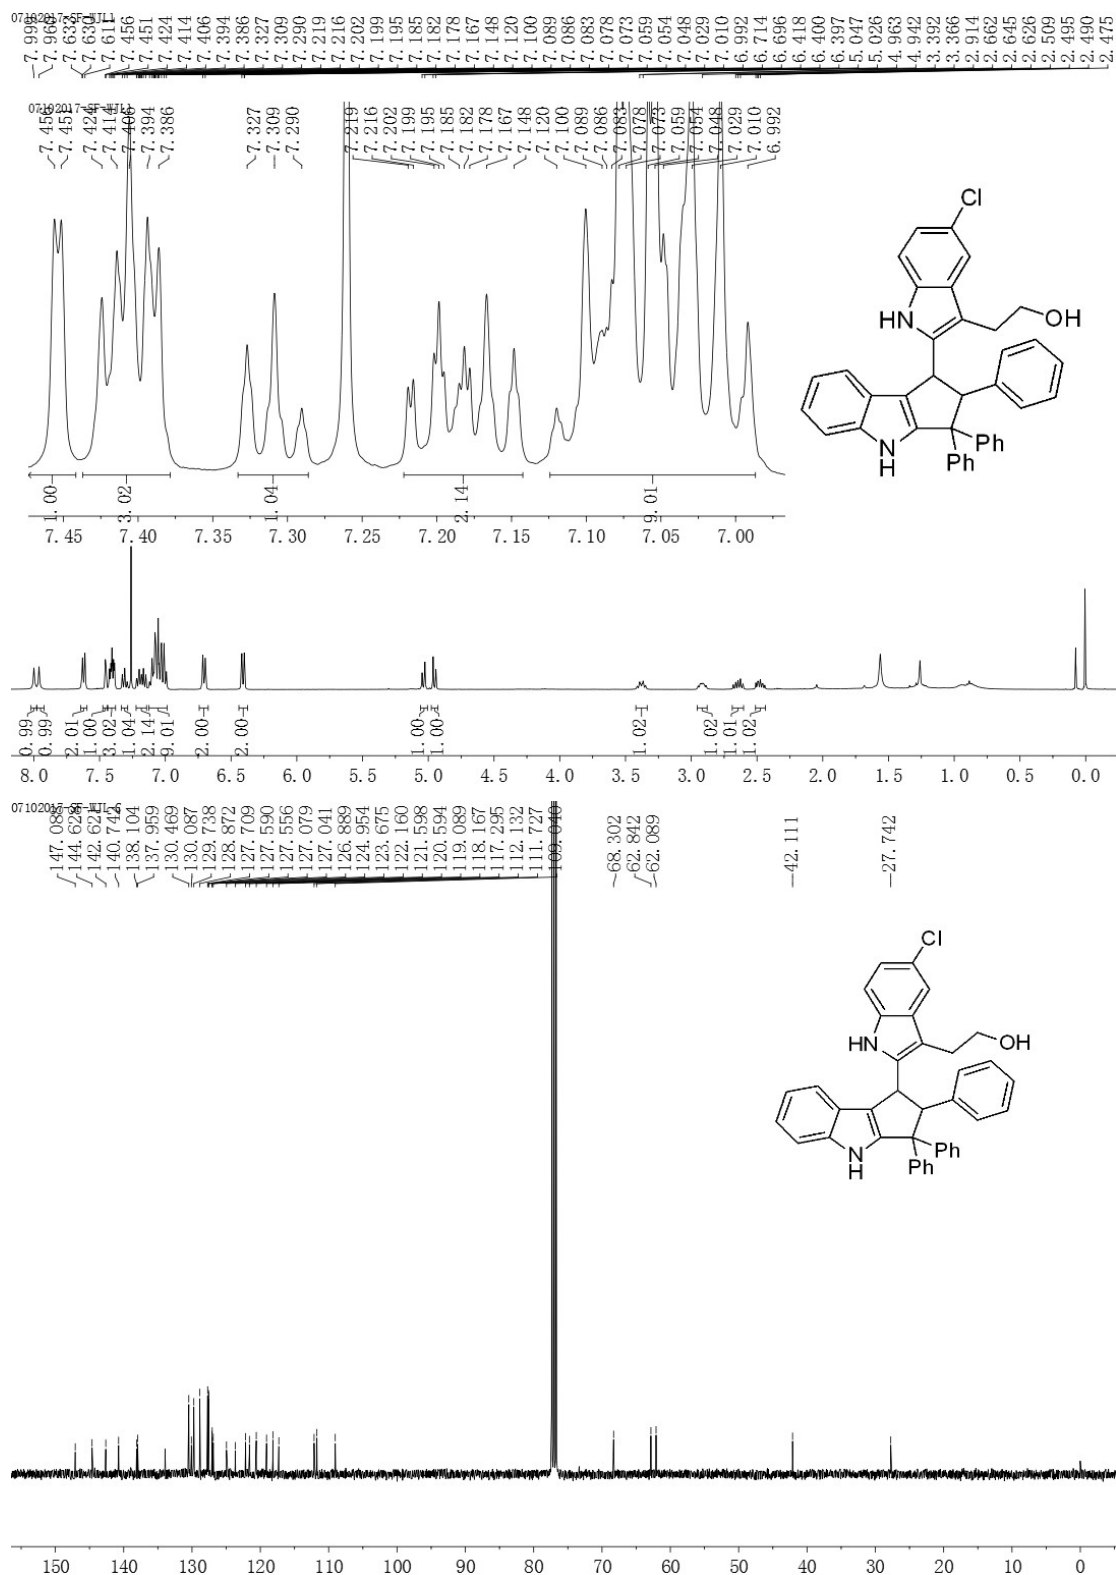

1504245-stj

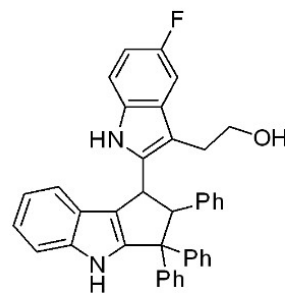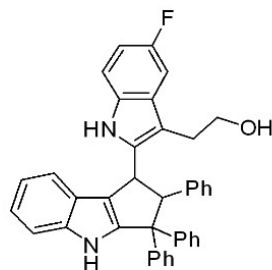



The figure displays the  $^1\text{H}$  and  $^{13}\text{C}$  NMR spectra of compound 10, along with its chemical structure.

**Chemical Structure:** The structure of compound 10 is shown, featuring a central indole ring system substituted with a 2-methyl-3-(2-hydroxyethyl)indol-5-yl group, a 2-phenyl-3-phenyl-4-phenyl-1H-indol-5-yl group, and a 2-phenyl-3-phenyl-4-phenyl-1H-indol-5-yl group.

**$^1\text{H}$  NMR Spectrum:** The  $^1\text{H}$  NMR spectrum (top) shows peaks in the aromatic region (6.94–7.18 ppm) and the aliphatic region (2.42–2.99 ppm). Integration values are provided below the peaks.

**$^{13}\text{C}$  NMR Spectrum:** The  $^{13}\text{C}$  NMR spectrum (bottom) shows peaks in the aromatic region (108.60–140.74 ppm) and the aliphatic region (21.50–42.10 ppm).

**4af**

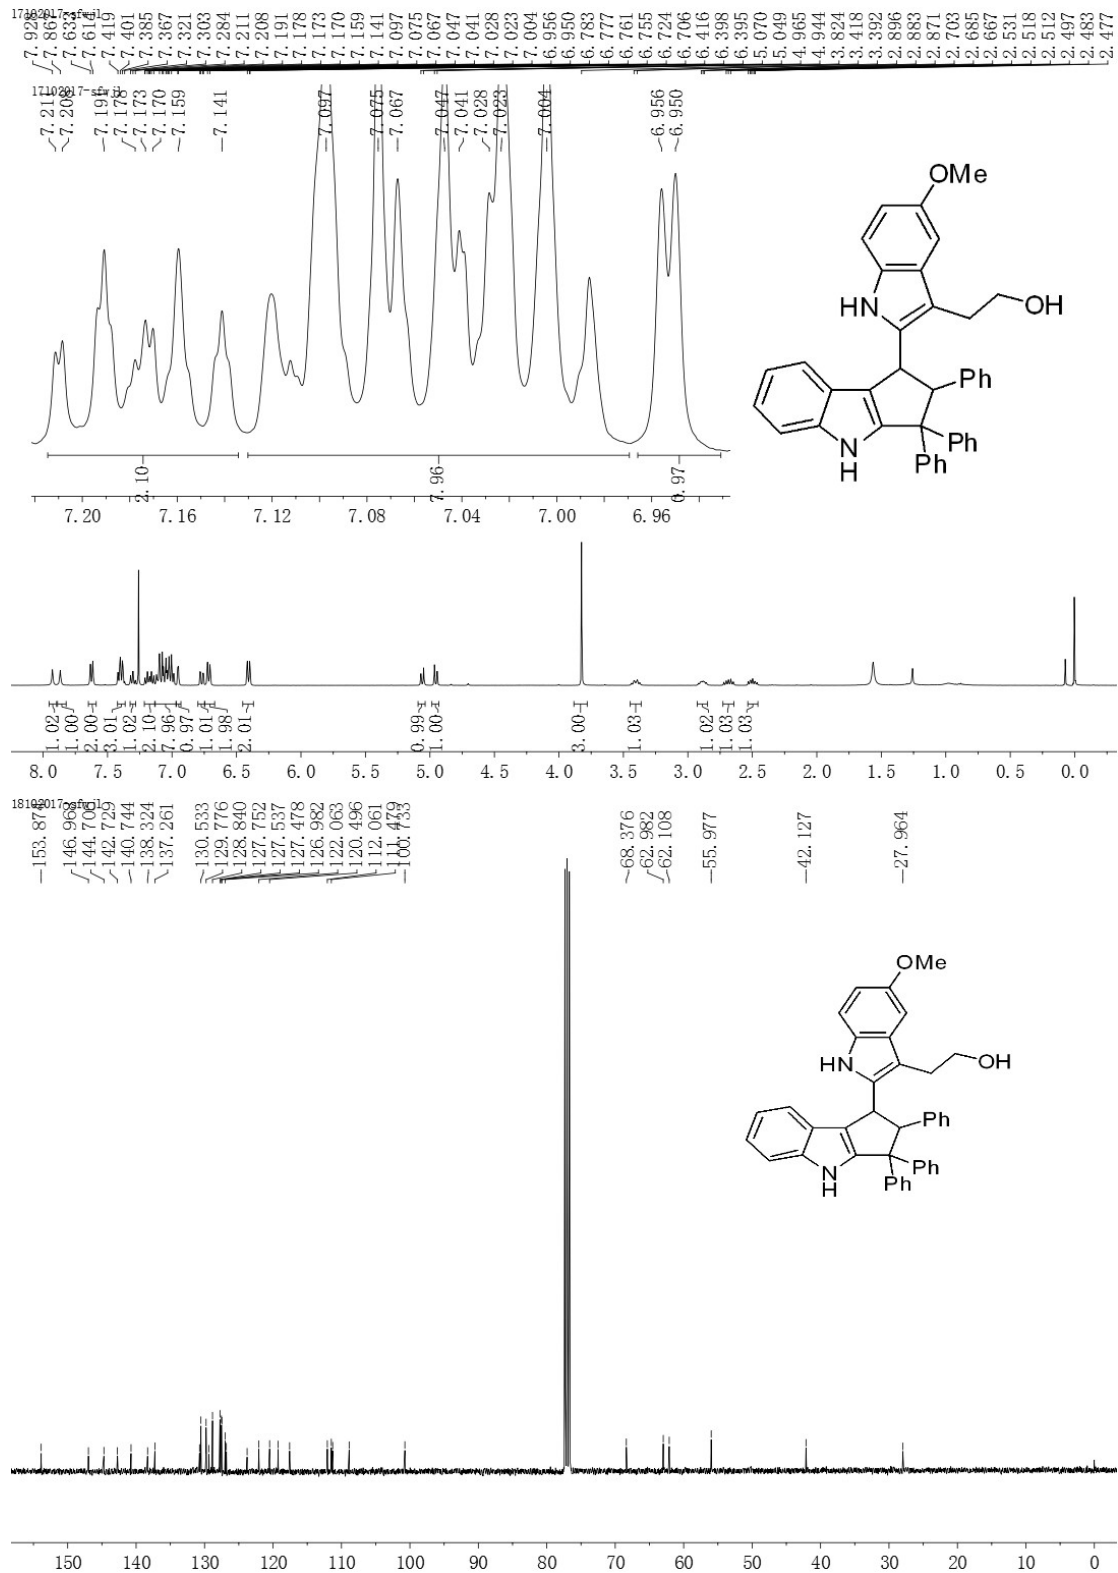

4ag

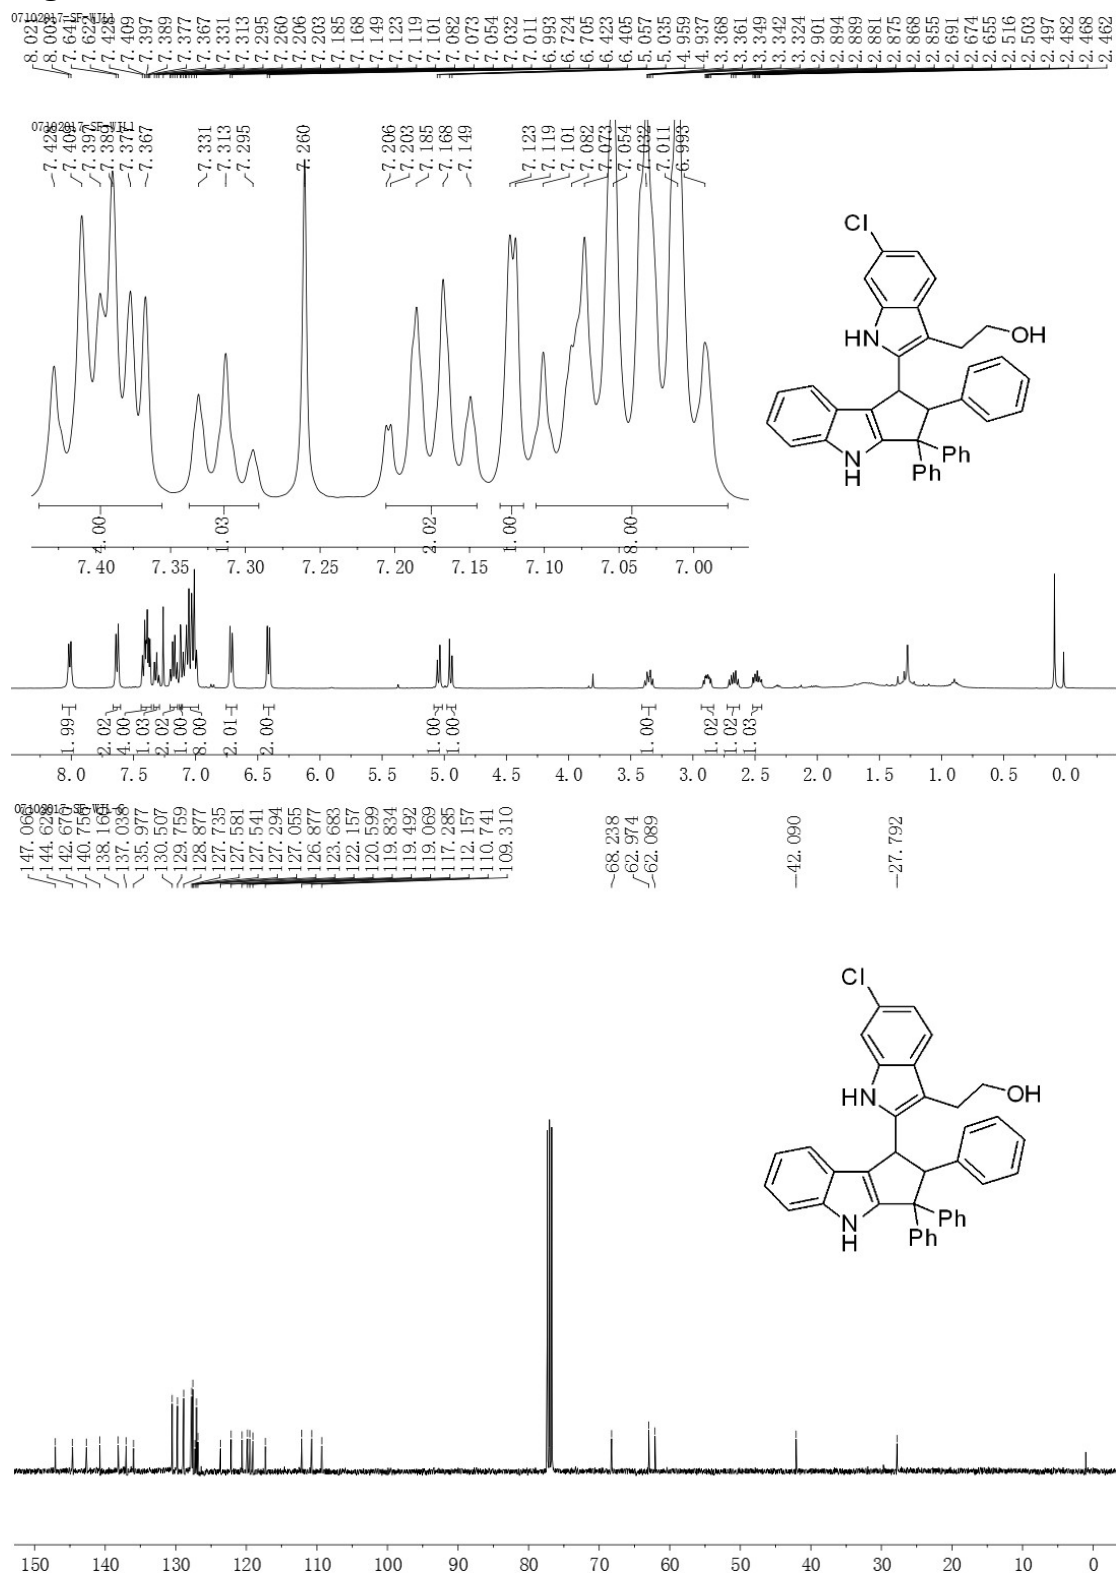

4ai

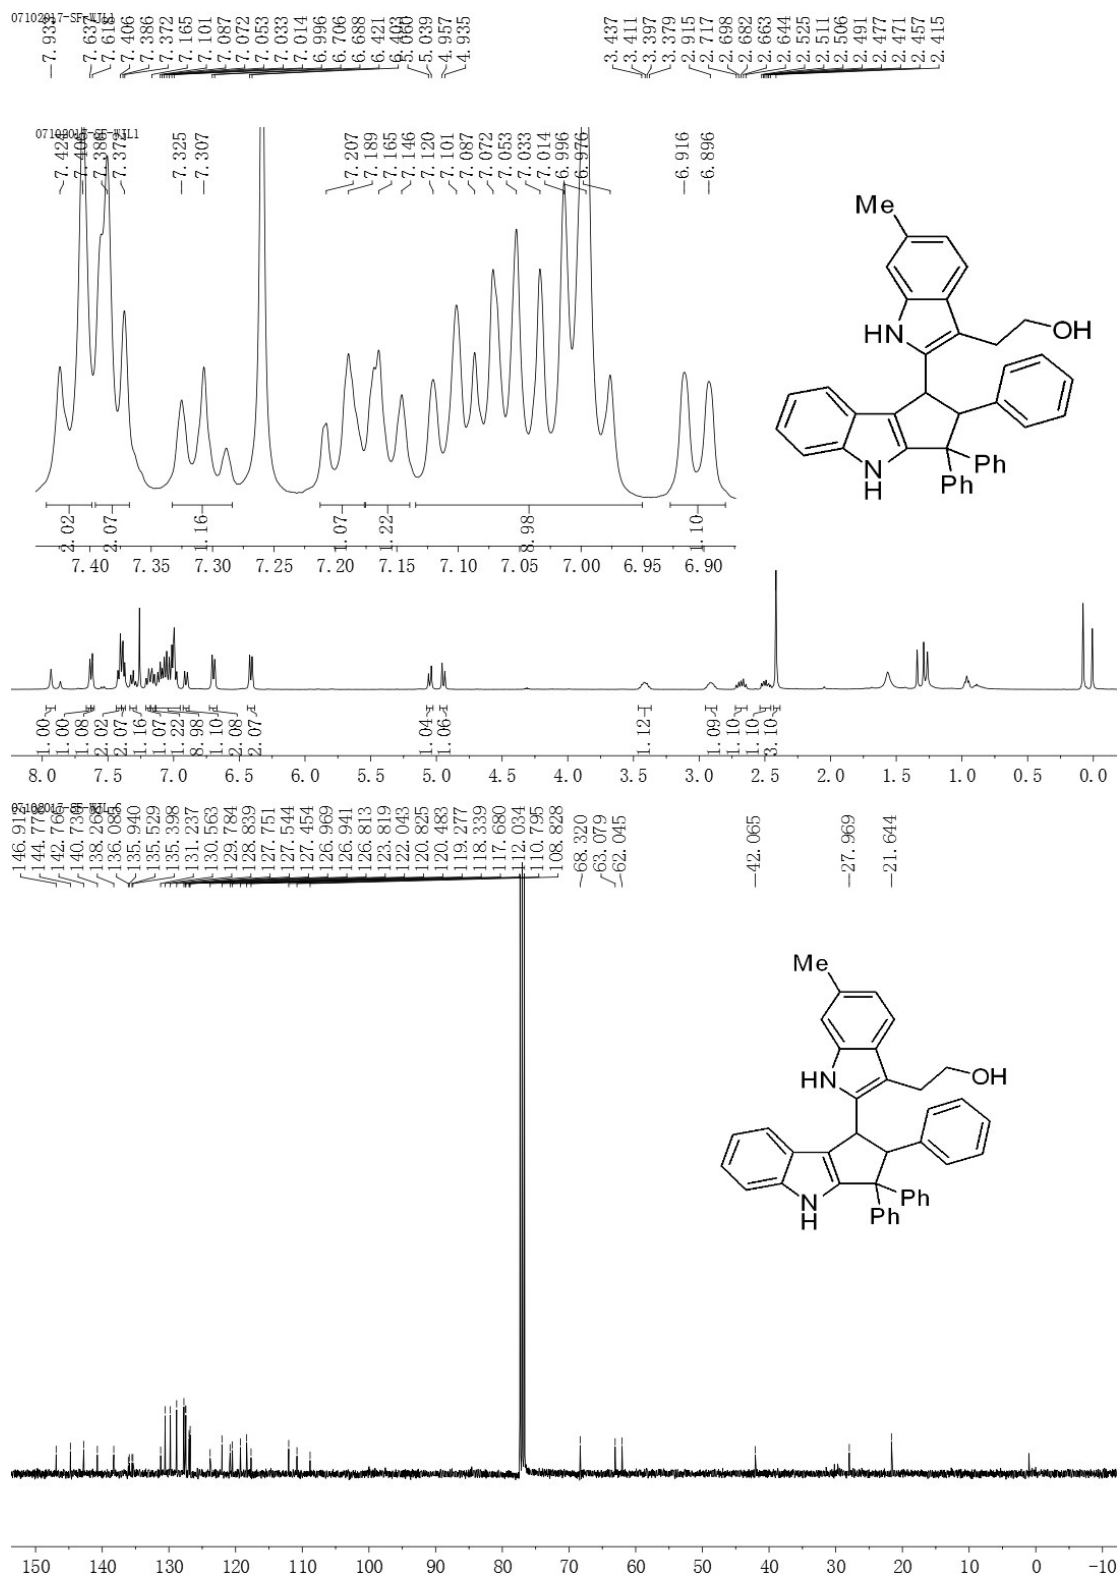

26520

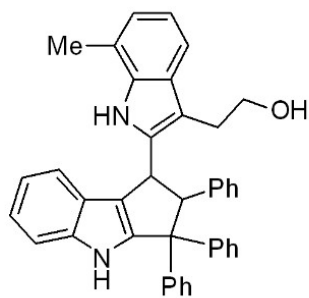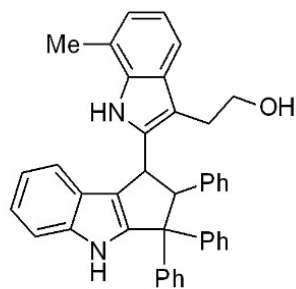

# 4ak

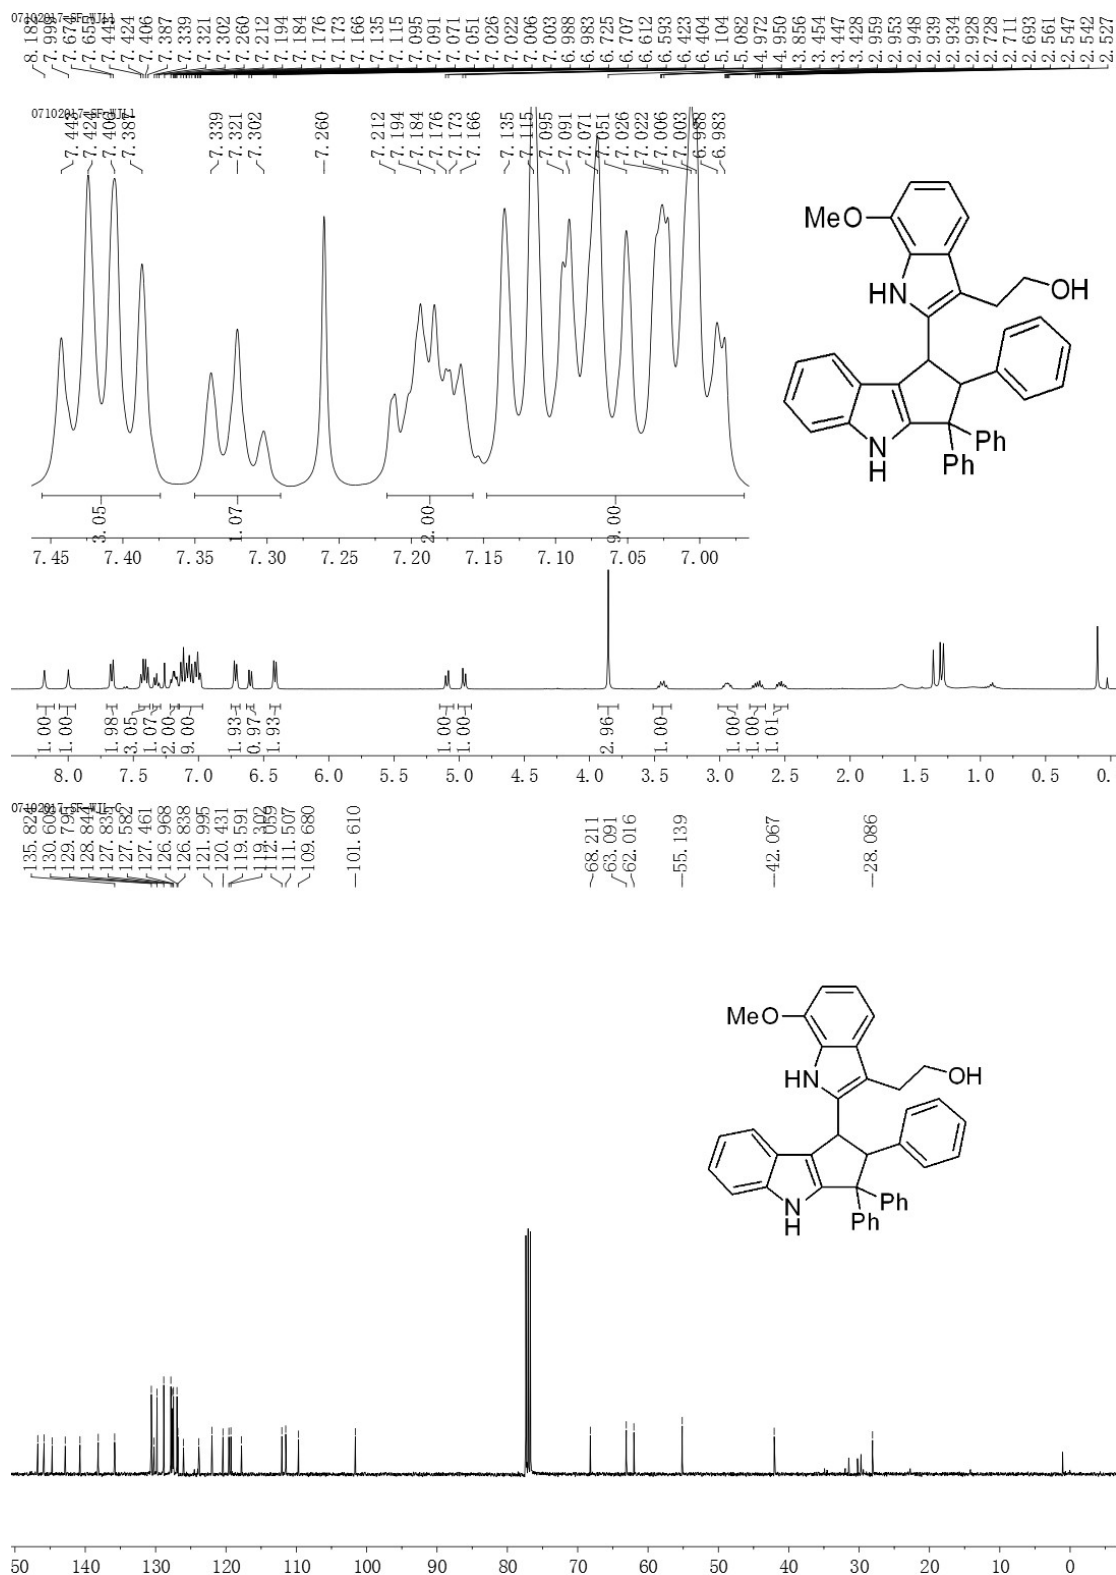

# 4al

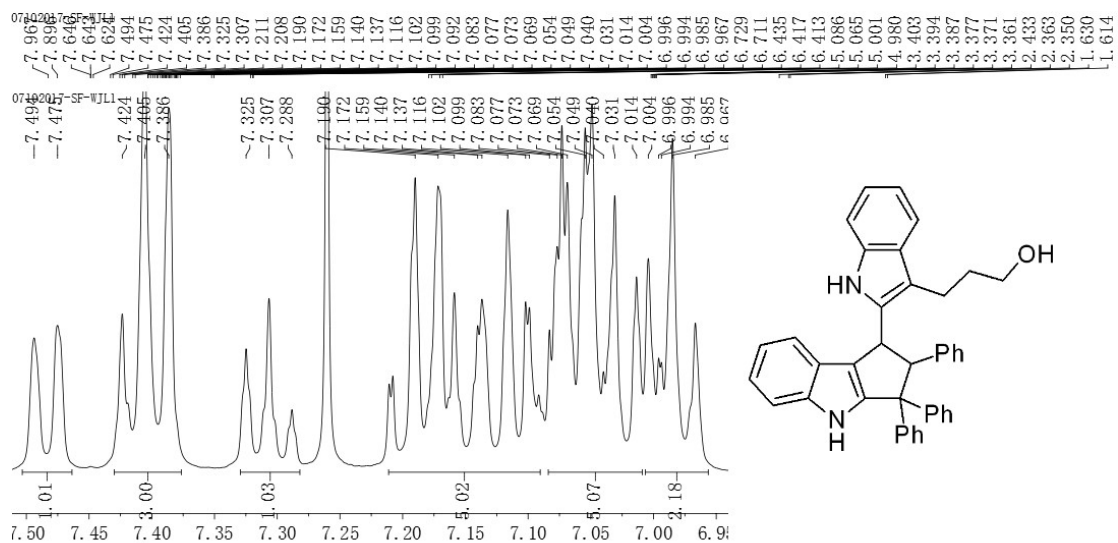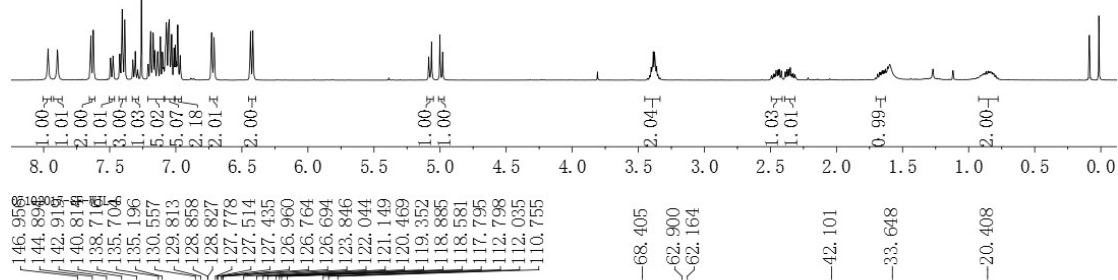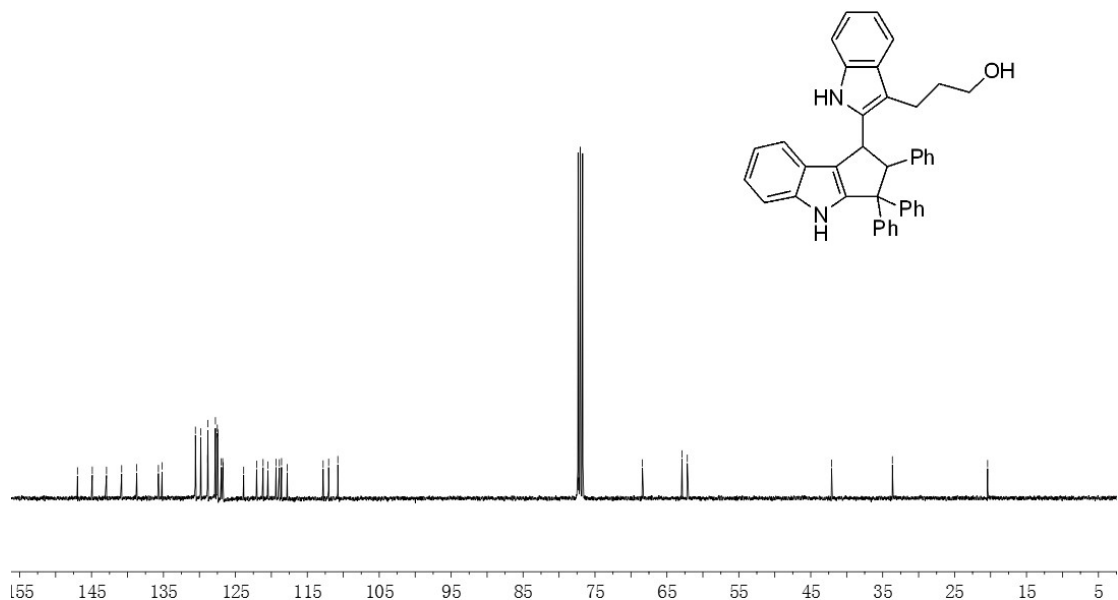

# Compound 6

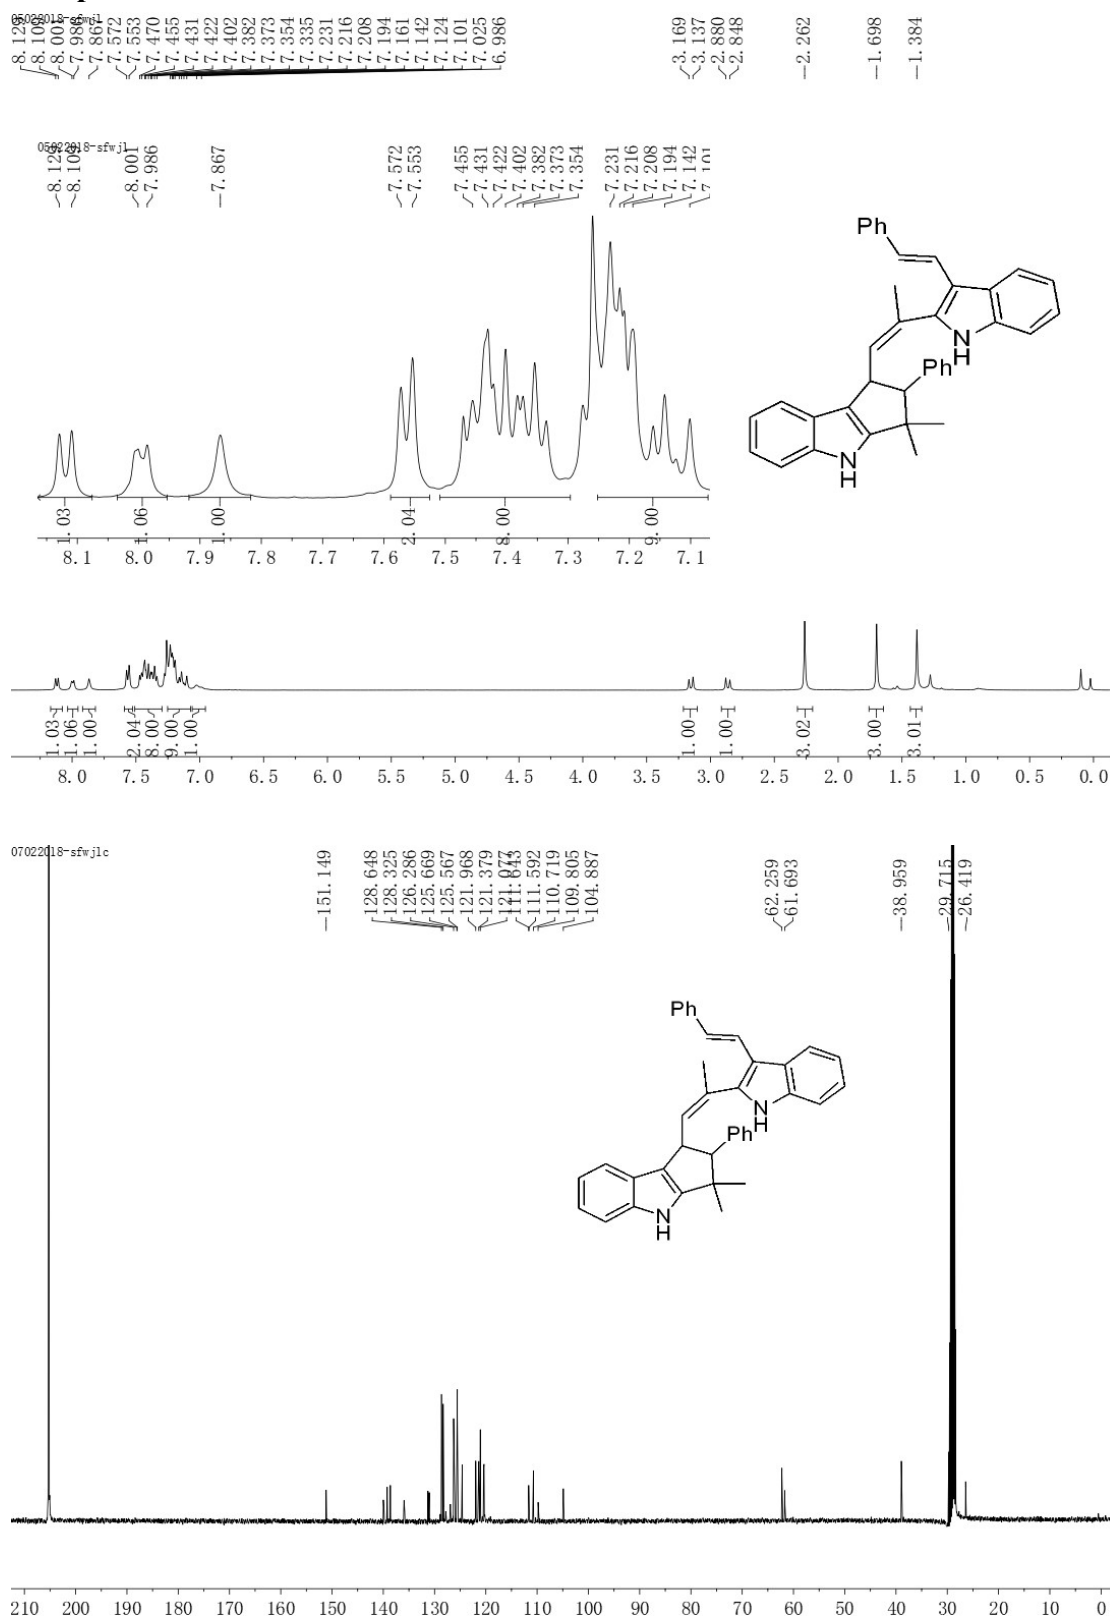



## Compound 7

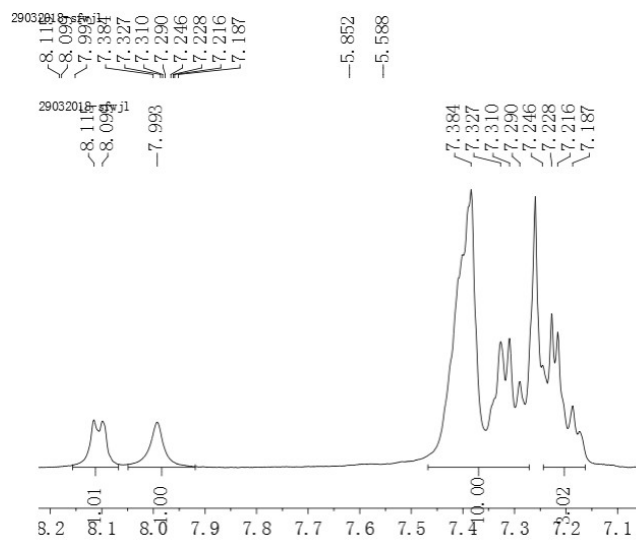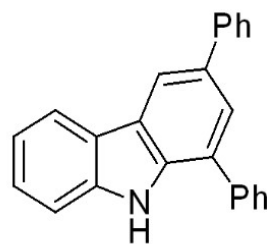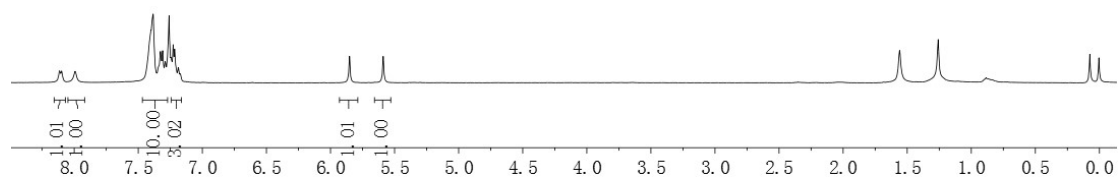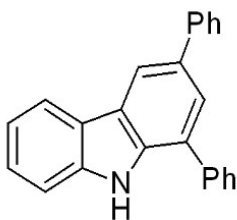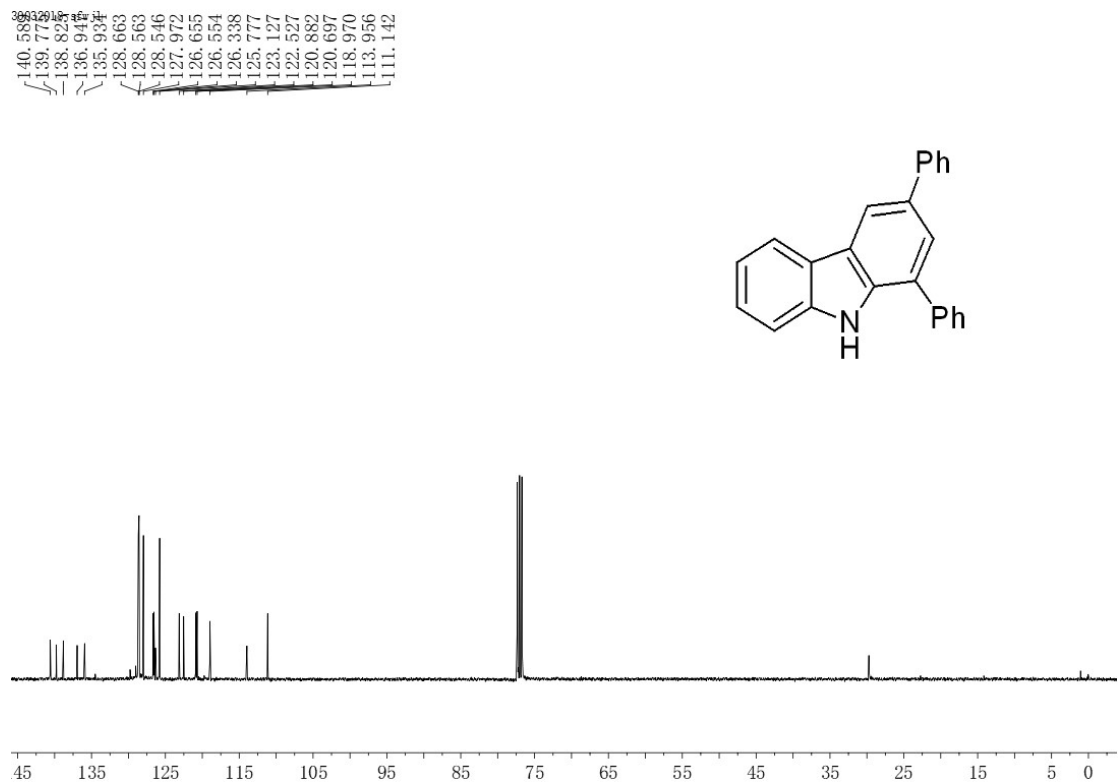

# Compound 8

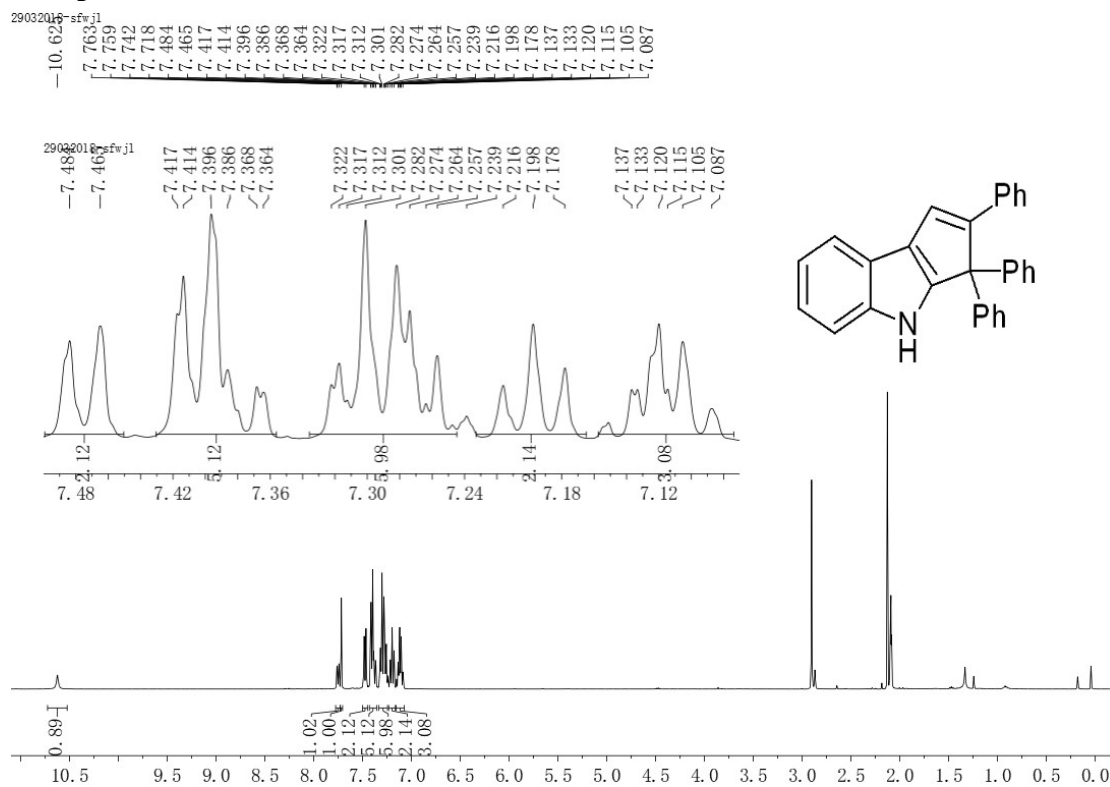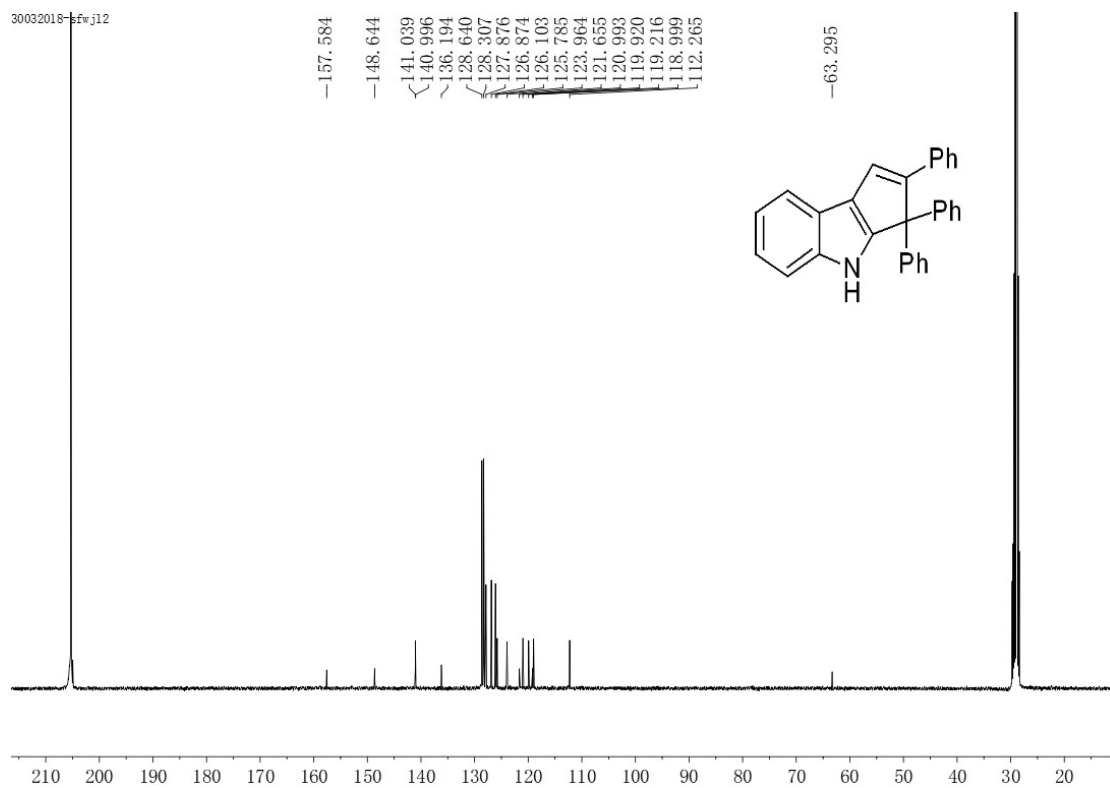

## 2. HPLC copies of product 3aa

Racemic:

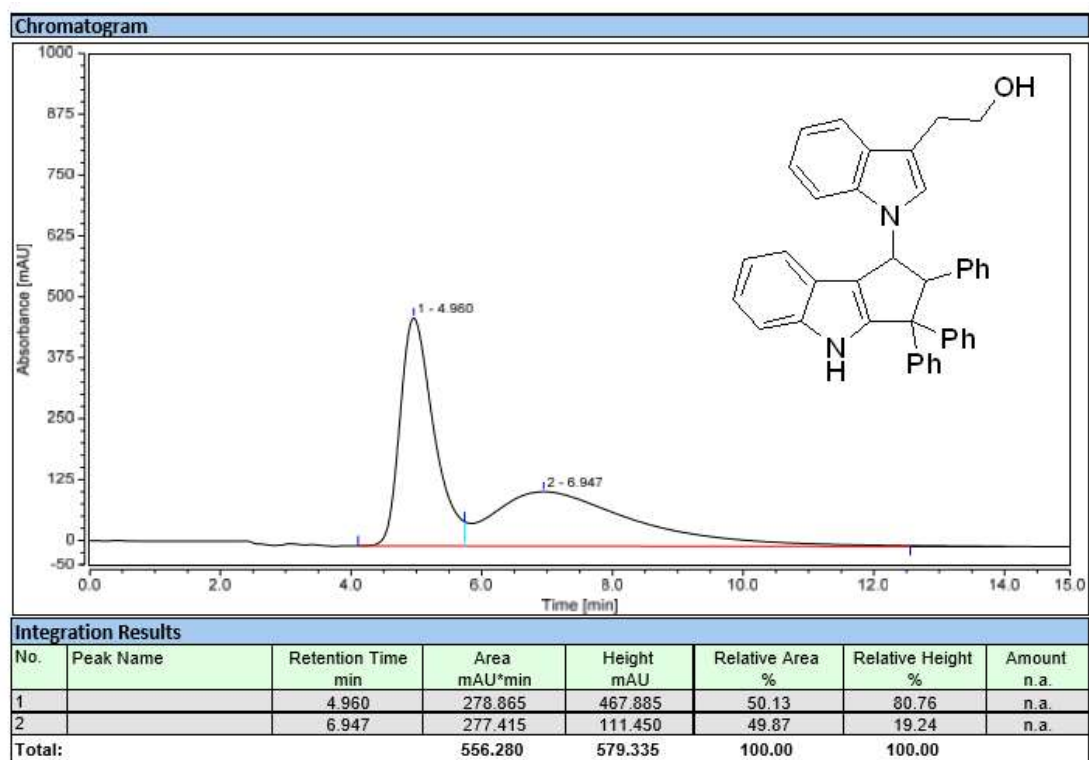

Enantioselective:

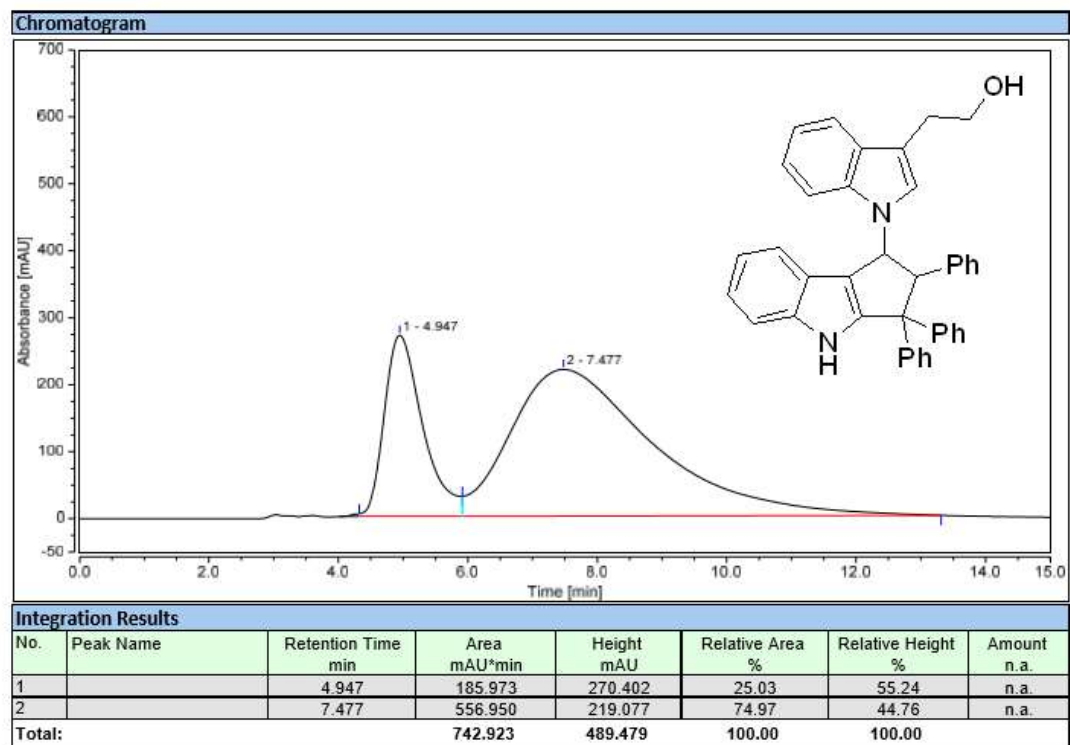

### 3. X-ray analysis of product 3aa and 4aa

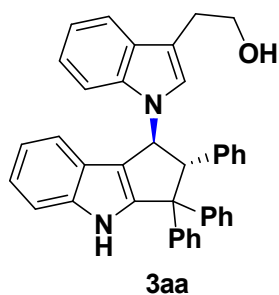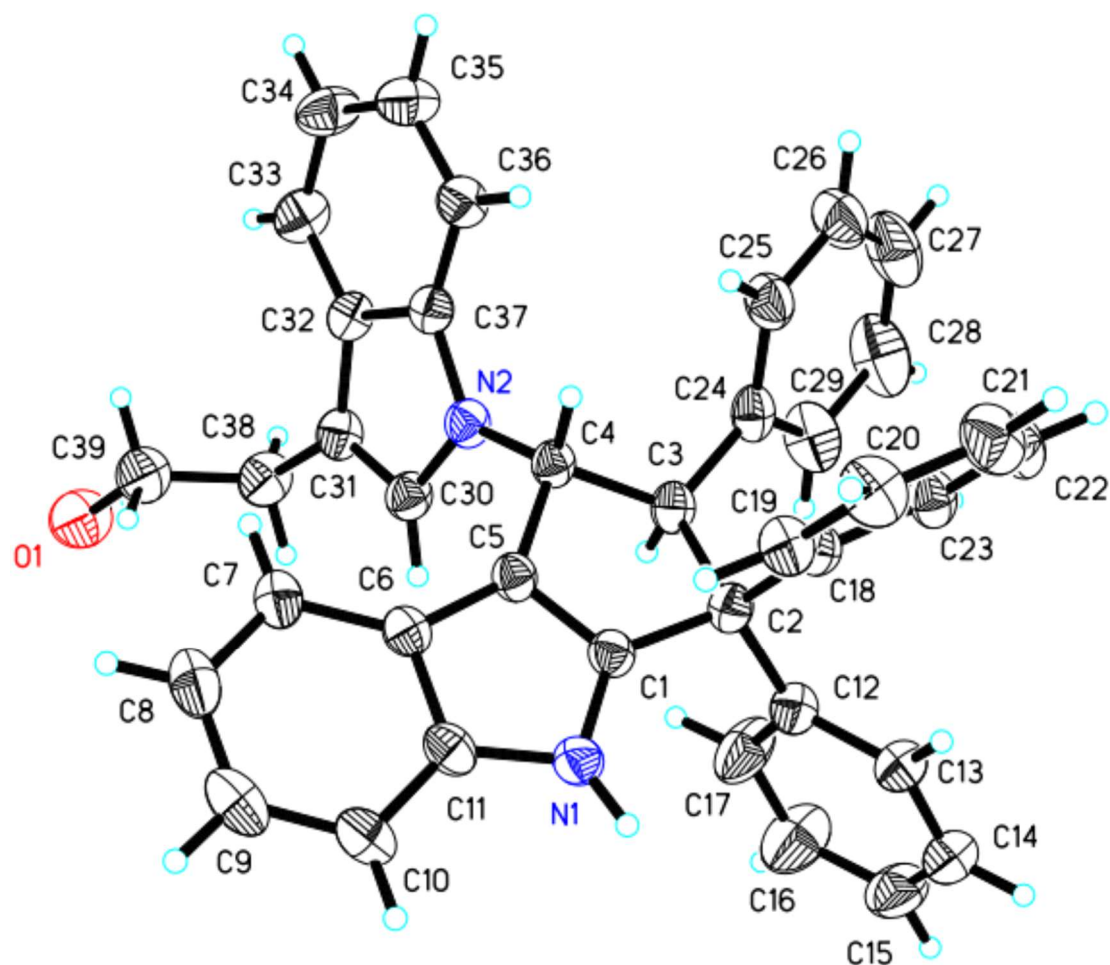

The thermal ellipsoid was drawn at the 30% probability level.

**Figure S1.** Single crystal structure of **3aa**

|                      |                 |                              |
|----------------------|-----------------|------------------------------|
| Temperature          | 296.15 K        |                              |
| Wavelength           | 0.71073 Å       |                              |
| Crystal system       | Monoclinic      |                              |
| Space group          | C 1 2/c 1       |                              |
| Unit cell dimensions | a = 23.869(3) Å | $\alpha = 90^\circ$ .        |
|                      | b = 13.815(2) Å | $\beta = 103.665(2)^\circ$ . |
|                      | c = 19.332(3) Å | $\gamma = 90^\circ$ .        |

|                                   |                                                               |
|-----------------------------------|---------------------------------------------------------------|
| Volume                            | 6194.3(15) Å <sup>3</sup>                                     |
| Z                                 | 8                                                             |
| Density (calculated)              | 1.259 Mg/m <sup>3</sup>                                       |
| Absorption coefficient            | 0.158 mm <sup>-1</sup>                                        |
| F(000)                            | 2472                                                          |
| Crystal size                      | 0.3 x 0.3 x 0.1 mm <sup>3</sup>                               |
| Theta range for data collection   | 2.447 to 27.484°.                                             |
| Index ranges                      | -30<= <i>h</i> <=21, -16<= <i>k</i> <=17, -24<= <i>l</i> <=25 |
| Reflections collected             | 18186                                                         |
| Independent reflections           | 6952 [R(int) = 0.0339]                                        |
| Completeness to theta = 25.242°   | 99.7 %                                                        |
| Absorption correction             | Semi-empirical from equivalents                               |
| Max. and min. transmission        | 0.7456 and 0.6720                                             |
| Refinement method                 | Full-matrix least-squares on F <sup>2</sup>                   |
| Data / restraints / parameters    | 6952 / 0 / 394                                                |
| Goodness-of-fit on F <sup>2</sup> | 1.034                                                         |
| Final R indices [I>2sigma(I)]     | R1 = 0.0648, wR2 = 0.1705                                     |
| R indices (all data)              | R1 = 0.1219, wR2 = 0.2013                                     |
| Extinction coefficient            | n/a                                                           |
| Largest diff. peak and hole       | 0.387 and -0.483 e.Å <sup>-3</sup>                            |

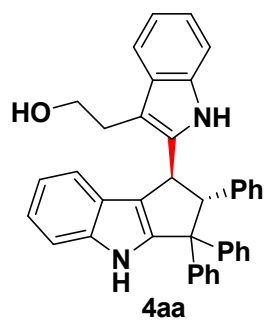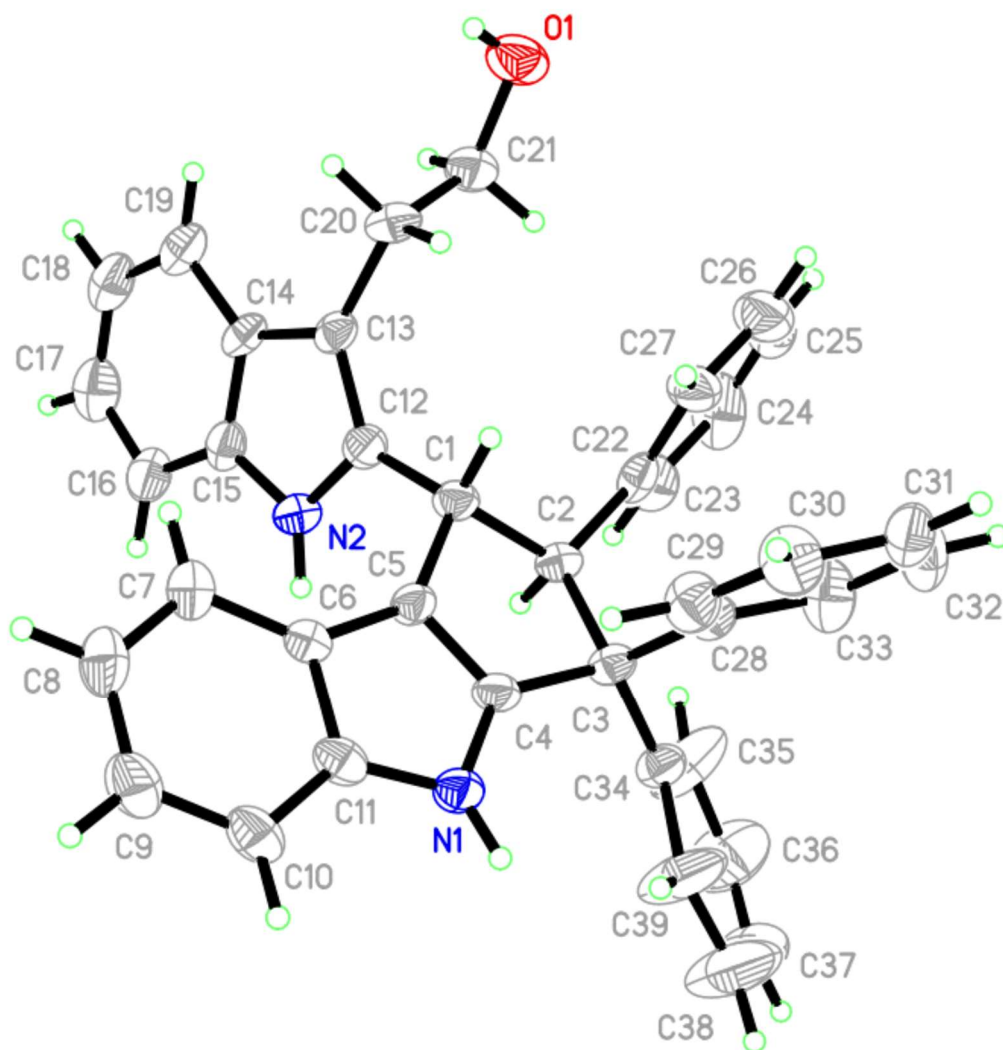

The thermal ellipsoid was drawn at the 30% probability level.

**Figure S2.** Single crystal structure of **4aa**

|                   |                                                  |
|-------------------|--------------------------------------------------|
| Empirical formula | C <sub>39</sub> H <sub>32</sub> N <sub>2</sub> O |
| Formula weight    | 544.66                                           |
| Temperature       | 296.15 K                                         |
| Wavelength        | 0.71073 Å                                        |
| Crystal system    | Orthorhombic                                     |

|                                   |                                               |          |
|-----------------------------------|-----------------------------------------------|----------|
| Space group                       | P2 <sub>1</sub> 2 <sub>1</sub> 2 <sub>1</sub> |          |
| Unit cell dimensions              | a = 11.228(6) Å                               | α = 90°. |
|                                   | b = 16.224(8) Å                               | β = 90°. |
|                                   | c = 18.542(9) Å                               | γ = 90°. |
| Volume                            | 3378(3) Å <sup>3</sup>                        |          |
| Z                                 | 4                                             |          |
| Density (calculated)              | 1.071 Mg/m <sup>3</sup>                       |          |
| Absorption coefficient            | 0.064 mm <sup>-1</sup>                        |          |
| F(000)                            | 1152                                          |          |
| Crystal size                      | 0.25 x 0.22 x 0.2 mm <sup>3</sup>             |          |
| Theta range for data collection   | 2.530 to 26.749°.                             |          |
| Index ranges                      | -10 ≤ h ≤ 14, -20 ≤ k ≤ 20, -23 ≤ l ≤ 23      |          |
| Reflections collected             | 19183                                         |          |
| Independent reflections           | 6988 [R(int) = 0.0381]                        |          |
| Completeness to theta = 25.242°   | 99.6 %                                        |          |
| Absorption correction             | Semi-empirical from equivalents               |          |
| Max. and min. transmission        | 0.7455 and 0.6449                             |          |
| Refinement method                 | Full-matrix least-squares on F <sup>2</sup>   |          |
| Data / restraints / parameters    | 6988 / 0 / 380                                |          |
| Goodness-of-fit on F <sup>2</sup> | 0.934                                         |          |
| Final R indices [I > 2σ(I)]       | R1 = 0.0762, wR2 = 0.2088                     |          |
| R indices (all data)              | R1 = 0.1074, wR2 = 0.2341                     |          |
| Absolute structure parameter      | 0.0(9)                                        |          |
| Extinction coefficient            | n/a                                           |          |
| Largest diff. peak and hole       | 0.469 and -0.319 e.Å <sup>-3</sup>            |          |
